# Supplementary material for: Fluorinated enamines of nucleobases as precursors of nucleoside analogues. Synthesis, spectroscopic and structural studies
Source: Royal Society of Chemistry journal article supplement (doi:10.1039/b9nj00617f), 2010-01-01

## Supporting Information

### Fluorinated enamines of nucleobases as precursors of nucleoside analogues. Synthesis, spectroscopic and structural studies

**Hanna Wójtowicz-Rajchel\***, **Magda Pasikowska**, **Anna Olejniczak**, **Andrzej Kartusiak** and **Henryk Koroniak\***

*Adam Mickiewicz University, Department of Chemistry, Grunwaldzka 6, 60-780 Poznań, Poland*

|                                                                                                                                                                                                                                 | Page |
|---------------------------------------------------------------------------------------------------------------------------------------------------------------------------------------------------------------------------------|------|
| The crystal data, structure refinement, the shortest intramolecular and intermolecular contacts for <b>(Z)-9b</b> .                                                                                                             | 2    |
| <sup>1</sup> H NMR and <sup>19</sup> F NMR spectra of compounds <b>(Z)-2c</b> , <b>(E)-2c</b> , <b>(Z)-3c</b> , <b>(E)-3c</b> , <b>(Z)-4c</b> , <b>(E)-4c</b> , <b>(Z)-6c</b> , <b>(E)-6c</b> , <b>(Z)-9c</b> and <b>(E)-9c</b> | 4    |

**Table S-1** Crystal data and structure refinement for **(Z)-9b** at 293K and 100K

|                                   |                                                                           |                                                   |
|-----------------------------------|---------------------------------------------------------------------------|---------------------------------------------------|
| Empirical formula                 | <b>C<sub>14</sub>H<sub>9</sub>F<sub>4</sub>N<sub>3</sub>O<sub>2</sub></b> |                                                   |
| Formula weight                    | 327.24                                                                    |                                                   |
| Temperature                       | 293(2) K                                                                  | 100(2) K                                          |
| Wavelength                        | 0.71073 Å                                                                 | 0.71073 Å                                         |
| Crystal system, space group       | Monoclinic, <i>P</i> 2 <sub>1</sub> / <i>n</i>                            | Monoclinic, <i>Pn</i>                             |
| Unit cell dimensions              | a = 15.3478(10) Å                                                         | a = 15.050(2) Å                                   |
|                                   | b = 6.2126(5) Å                                                           | b = 12.1206(19) Å                                 |
|                                   | c = 15.3478(10) Å                                                         | c = 15.425(2) Å                                   |
|                                   | β = 105.82 °                                                              | β = 105.596(12)°                                  |
| Volume                            | 1407.99(17) Å <sup>3</sup>                                                | 2710.1(7) Å <sup>3</sup>                          |
| Z, Calculated density             | 4, 1.544 g/cm <sup>3</sup>                                                | 8, 1.604 g/cm <sup>3</sup>                        |
| Absorption coefficient            | 0.141 mm <sup>-1</sup>                                                    | 0.147 mm <sup>-1</sup>                            |
| F(000)                            | 664                                                                       | 1328                                              |
| Crystal size                      | 0.5 x 0.3 x 0.1 mm                                                        | 0.5 x 0.3 x 0.1 mm                                |
| Theta range for data collection   | 2.76 to 29.61°                                                            | 2.74° to 29.28°                                   |
| Limiting indices                  | -19 ≤ h ≤ 20, -8 ≤ k ≤ 8,<br>-20 ≤ l ≤ 20                                 | -20 ≤ h ≤ 15, -15 ≤ k ≤ 16,<br>-21 ≤ l ≤ 18       |
| Reflections collected / unique    | 13124 / 3655 [R(int) = 0.1225]                                            | 17292 / 8467 [R(int) = 0.0404]                    |
| Completeness to θ = 29.61°        | 92.2%                                                                     | 91.2 %                                            |
| Refinement method                 | Full-matrix least-squares on F <sup>2</sup>                               | Full-matrix least-squares on F <sup>2</sup>       |
| Data / restraints / parameters    | 3655 / 0 / 285                                                            | 8467 / 8 / 874                                    |
| Goodness-of-fit on F <sup>2</sup> | 1.132                                                                     | 1.140                                             |
| Final R indices [I > 2σ(I)]       | R <sub>1</sub> = 0.0603, wR <sub>2</sub> = 0.1239                         | R <sub>1</sub> = 0.0822, wR <sub>2</sub> = 0.2454 |
| R indices (all data)              | R <sub>1</sub> = 0.1133, wR <sub>2</sub> = 0.1884                         | R <sub>1</sub> = 0.0969, wR <sub>2</sub> = 0.2706 |
| Absolute structure parameter      | -                                                                         | -0.3(10)                                          |
| Largest diff. peak and hole       | 0.390 and -0.378 e.Å <sup>-3</sup>                                        | 1.750 and -0.683 e.Å <sup>-3</sup>                |

**Table S-2.** Intramolecular contacts for **(Z)-9b** [Å and °].

| <b>D-H...A</b> | <b>d(H...A)</b> | <b>d(D...A)</b> | <b>&lt;(DHA)</b> |
|----------------|-----------------|-----------------|------------------|
| C5A-H5A...O10A | 2.17            | 2.77(1)         | 121              |
| C5B-H5B...O10B | 2.18            | 2.76(1)         | 119              |

|                  |      |         |     |
|------------------|------|---------|-----|
| C5D-H5D...O10D   | 2.20 | 2.79(1) | 120 |
| C8B-H8B...O2B    | 2.28 | 2.79(1) | 114 |
| C5C-H5C...O10C   | 2.28 | 2.83(1) | 117 |
| C16D-H16D...O10D | 2.41 | 2.75(1) | 102 |
| C16A-H16A...O10A | 2.41 | 2.73(1) | 100 |
| C16B-H16B...O10B | 2.42 | 2.73(1) | 100 |
| C8DD-H8DD...O2D  | 2.45 | 2.91(1) | 111 |
| C16C-H16C...O10C | 2.49 | 2.79(1) | 100 |
| C8CC-H8CC...O2C  | 2.49 | 3.02(2) | 116 |

**Table S-3** Shortest intermolecular contacts for **(Z)-9b** [ $\text{\AA}$  and  $^\circ$ ] at 100 K. The hydrogen bonds with  $d(\text{D}\cdots\text{A})$  shorter than the sum of van der Waals radii have been highlighted in bold.

| D-H...A                 | d(H...A)    | d(D...A)       | <(DHA)     | symmetry code            |
|-------------------------|-------------|----------------|------------|--------------------------|
| <b>N4B-H4B...O2C</b>    | <b>2.08</b> | <b>2.91(1)</b> | <b>163</b> | <b>-0.5+x,-y,0.5+z</b>   |
| <b>N4C-H4C...O2A</b>    | <b>2.15</b> | <b>2.94(1)</b> | <b>154</b> | <b>0.5+x,1-y,-0.5+z</b>  |
| <b>N4D-H4D...O2B</b>    | <b>2.21</b> | <b>3.05(1)</b> | <b>163</b> | <b>0.5+x,-y,-0.5+z</b>   |
| <b>C6B-H6B...O10D</b>   | <b>2.25</b> | <b>3.16(2)</b> | <b>165</b> | <b>x,y,1+z</b>           |
| <b>C6A-H6A...O10C</b>   | <b>2.30</b> | <b>3.09(1)</b> | <b>143</b> | <b>x,y,1+z</b>           |
| <b>C6D-H6D...O10B</b>   | <b>2.31</b> | <b>3.22(1)</b> | <b>163</b> | <b>x,y,-1+z</b>          |
| <b>C6C-H6C...O10A</b>   | <b>2.38</b> | <b>3.15(1)</b> | <b>141</b> | <b>x,y,-1+z</b>          |
| C12B-H12B...O2C         | 2.39        | 3.30(1)        | 167        | -0.5+x,-y,0.5+z          |
| C12C-H12C...O2A         | 2.41        | 3.33(1)        | 170        | 0.5+x,1-y,-0.5+z         |
| <b>C13B-H13B...F1D</b>  | <b>2.41</b> | <b>3.04(1)</b> | <b>124</b> | <b>-0.5+x,-1-y,0.5+z</b> |
| C12A-H12A...O2D         | 2.45        | 3.35(1)        | 162        | -0.5+x,-y,0.5+z          |
| C12A-H12A...O2D         | 2.45        | 3.35(1)        | 162        | -0.5+x,-y,0.5+z          |
| C8B-H8B...F1A           | 2.49        | 3.38(1)        | 159        | x,-1+y,z                 |
| <b>C15A-H15A...F4D</b>  | <b>2.49</b> | <b>2.95(1)</b> | <b>110</b> | <b>x,y,1+z</b>           |
| C12D-H12D...O2B         | 2.50        | 3.41(1)        | 166        | 0.5+x,-y,-0.5+z          |
| <b>C15B-H15B...F4C</b>  | <b>2.55</b> | <b>3.16(1)</b> | <b>123</b> | <b>x,-1+y,1+z</b>        |
| C16A-H16A...F4CC        | 2.55        | 3.33(2)        | 142        | x,y,1+z                  |
| C8C-H8C...O2D           | 2.56        | 3.36(1)        | 144        | x, y, z                  |
| C15C-H15C...F3D         | 2.56        | 3.35(1)        | 143        | x,1+y,-1+z               |
| C15A-H15A...F2B         | 2.57        | 3.27(1)        | 132        | x,y,1+z                  |
| C15D-H15D...F1C         | 2.58        | 3.35(1)        | 141        | x,y,-1+z                 |
| <b>C12B-H12BA...F1D</b> | <b>2.59</b> | <b>3.12(1)</b> | <b>117</b> | <b>-0.5+x,-1-y,0.5+z</b> |
| C8A-H8A...O2B           | 2.62        | 3.38(1)        | 139        | x,1+y,z                  |
| C15B-H15B...F2A         | 2.64        | 3.49(1)        | 152        | x,-1+y,1+z               |
| C8C-H8C...N3D           | 2.97        | 3.87(1)        | 164        | x, y, z                  |
| C8A-H8A...N3B           | 2.98        | 3.89(1)        | 168        | x,1+y,z                  |

**Compounds (Z)-2c and (E)-2c**

<sup>1</sup>H NMR, 300 MHz, DMSO-d<sub>6</sub>

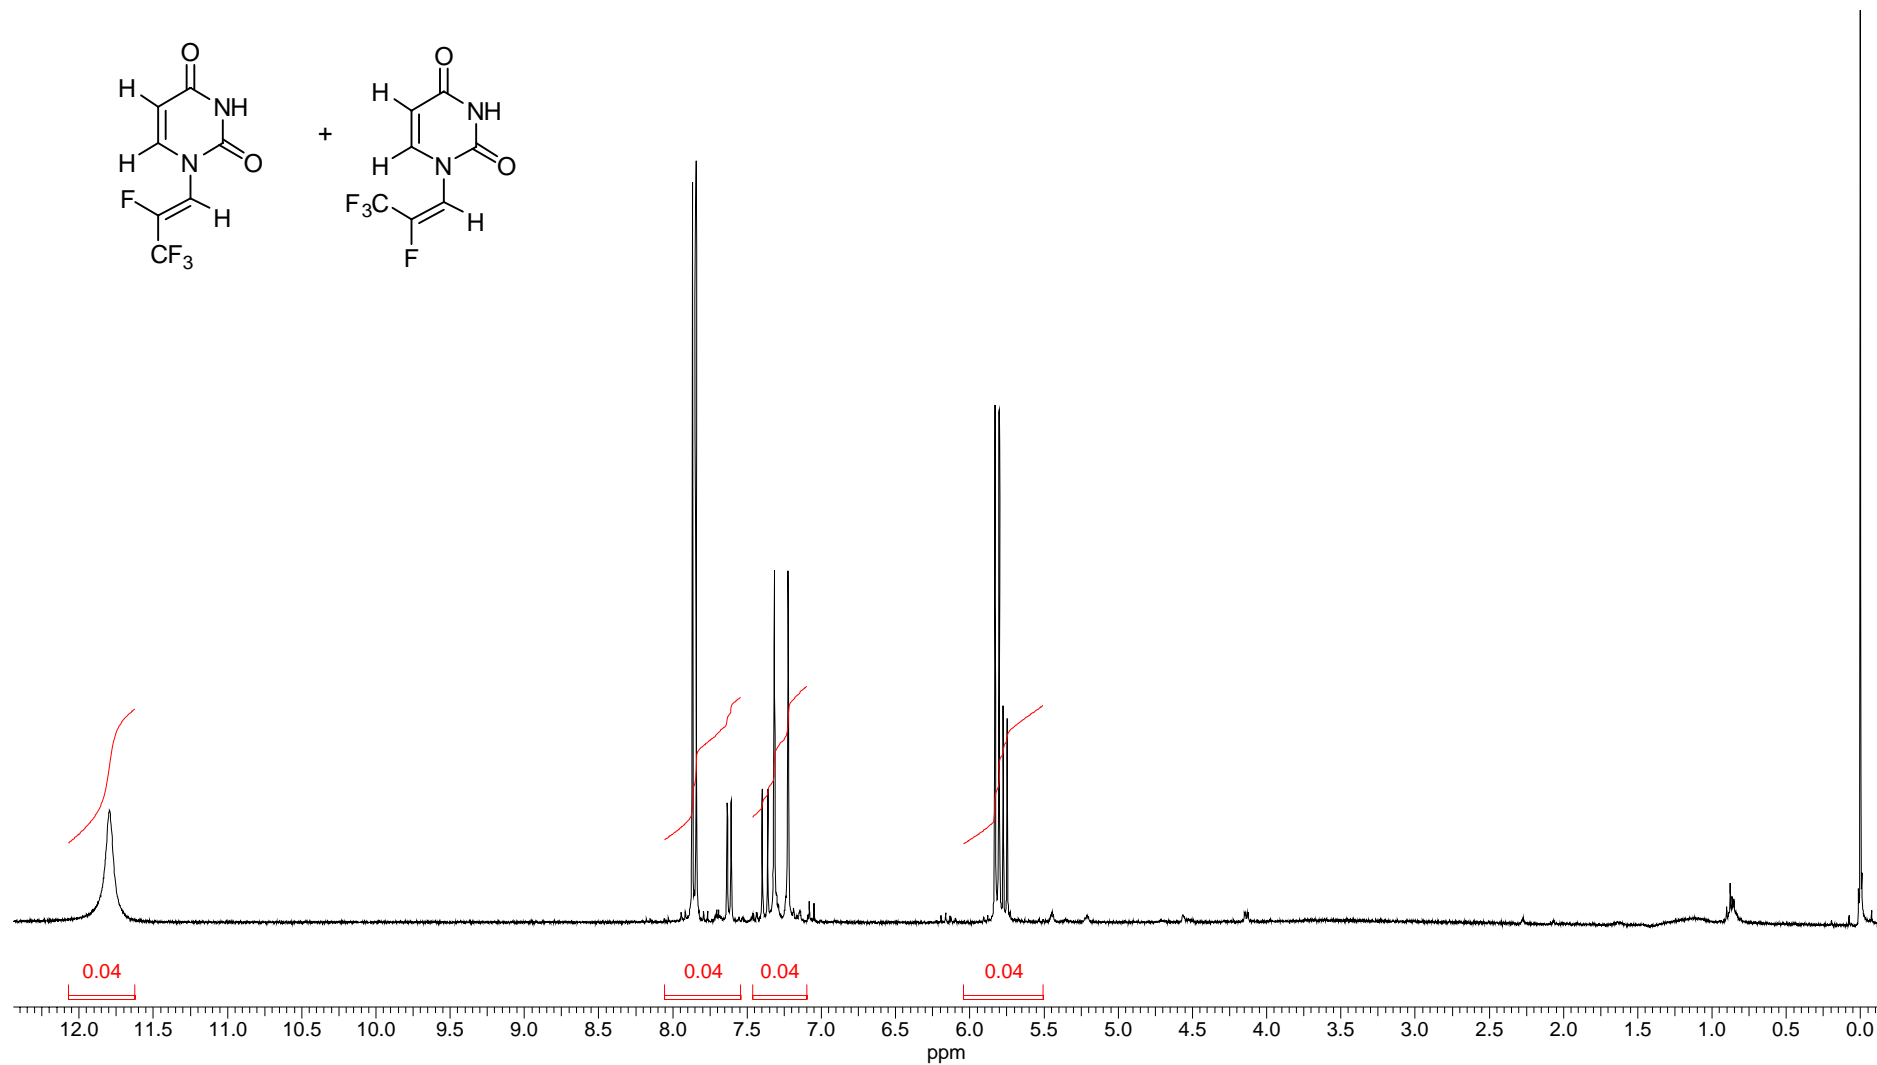

**Compound (Z)-2c**

$^1\text{H}$  NMR, 300 MHz,  $\text{CDCl}_3$

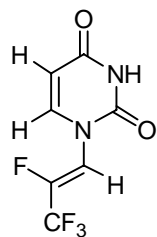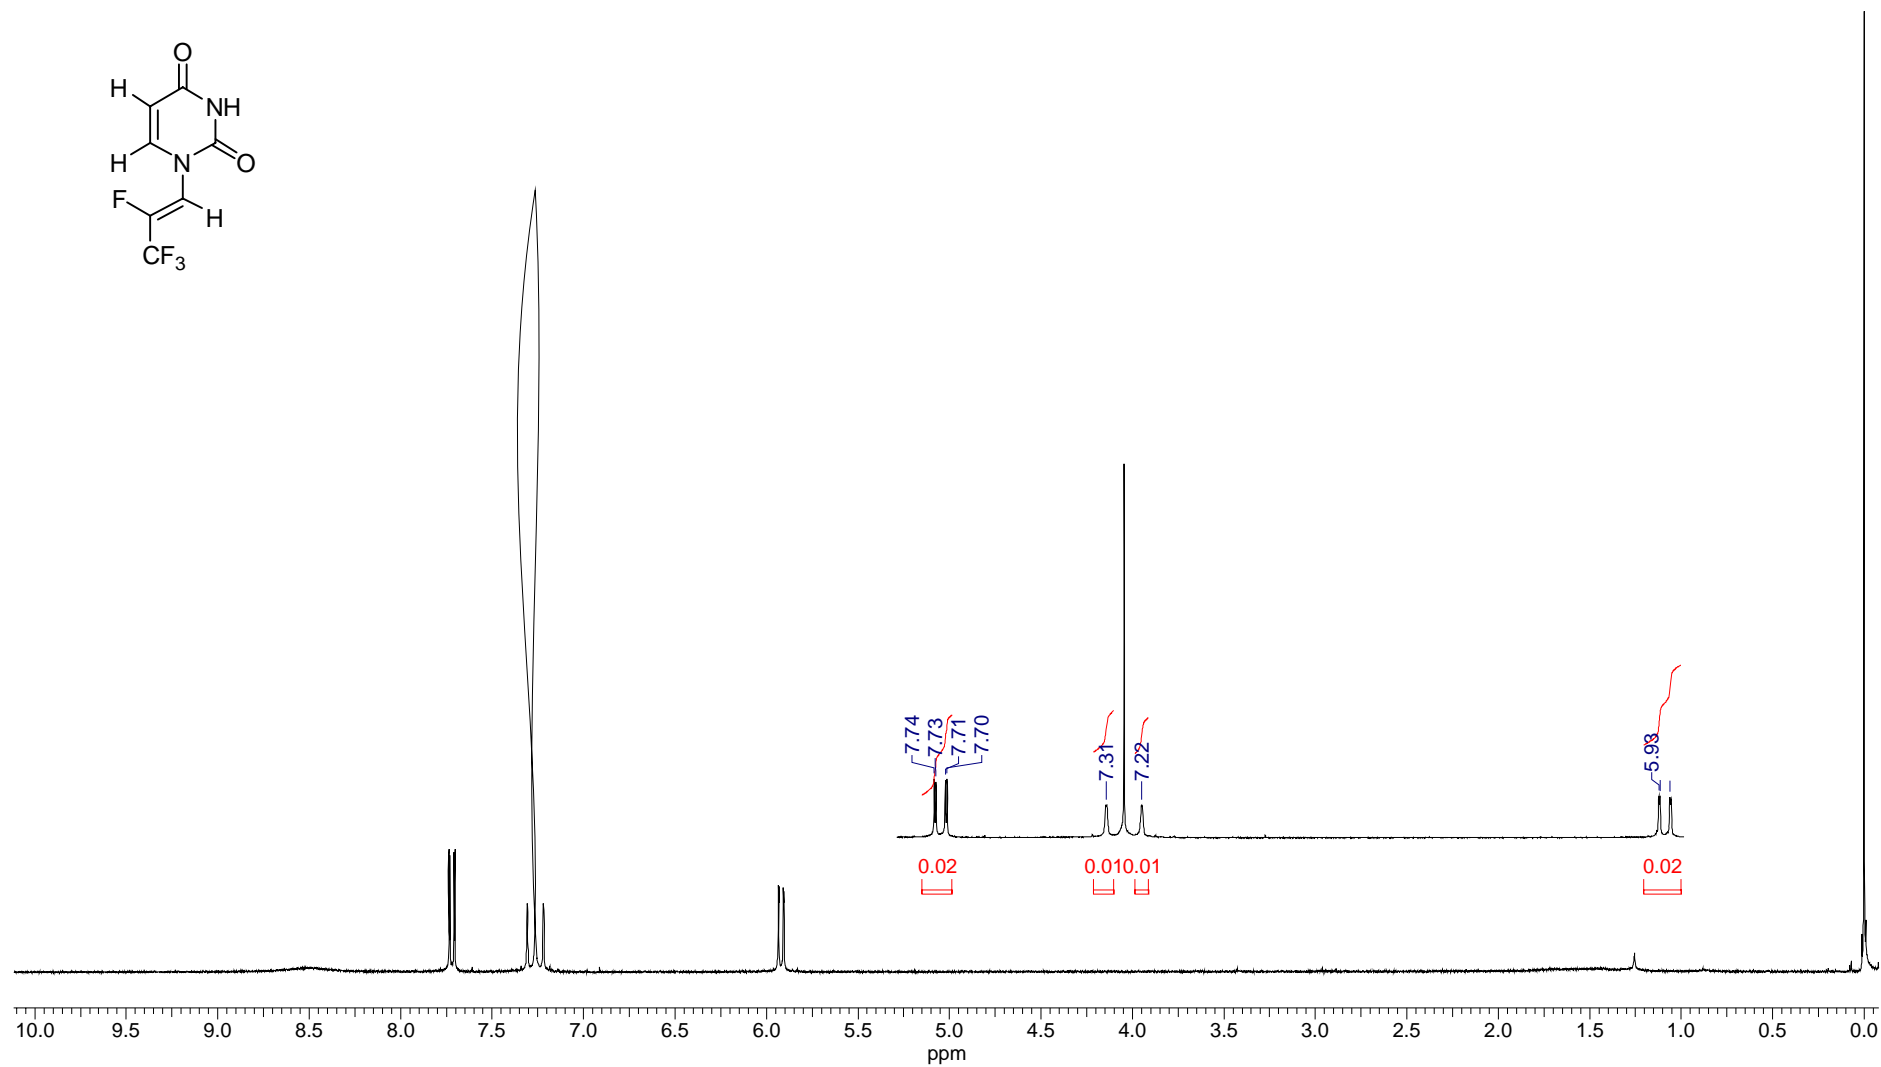

**Compound (E)-2c**

<sup>1</sup>H NMR, 300 MHz, CDCl<sub>3</sub>

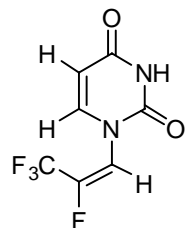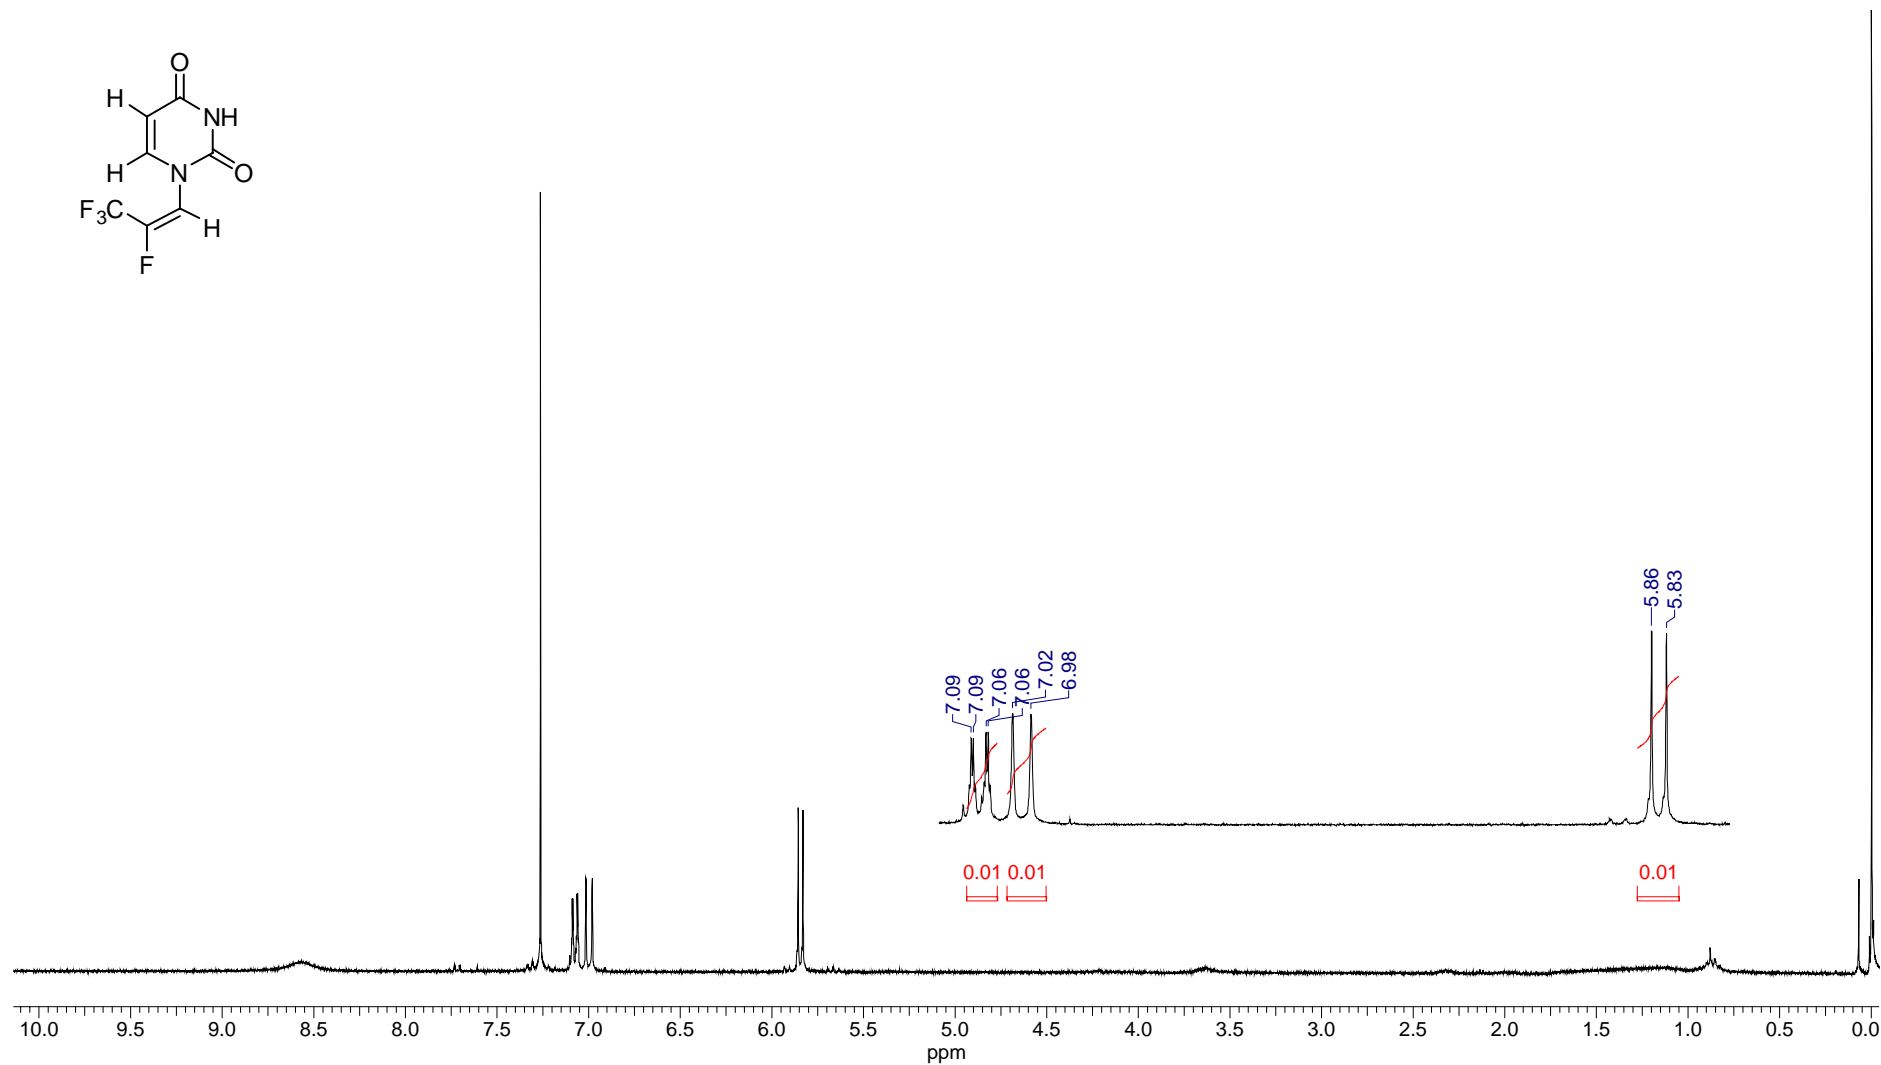

**Compound (Z)-2c**



$^{19}\text{F}$  NMR, 282 MHz,  $\text{CDCl}_3$

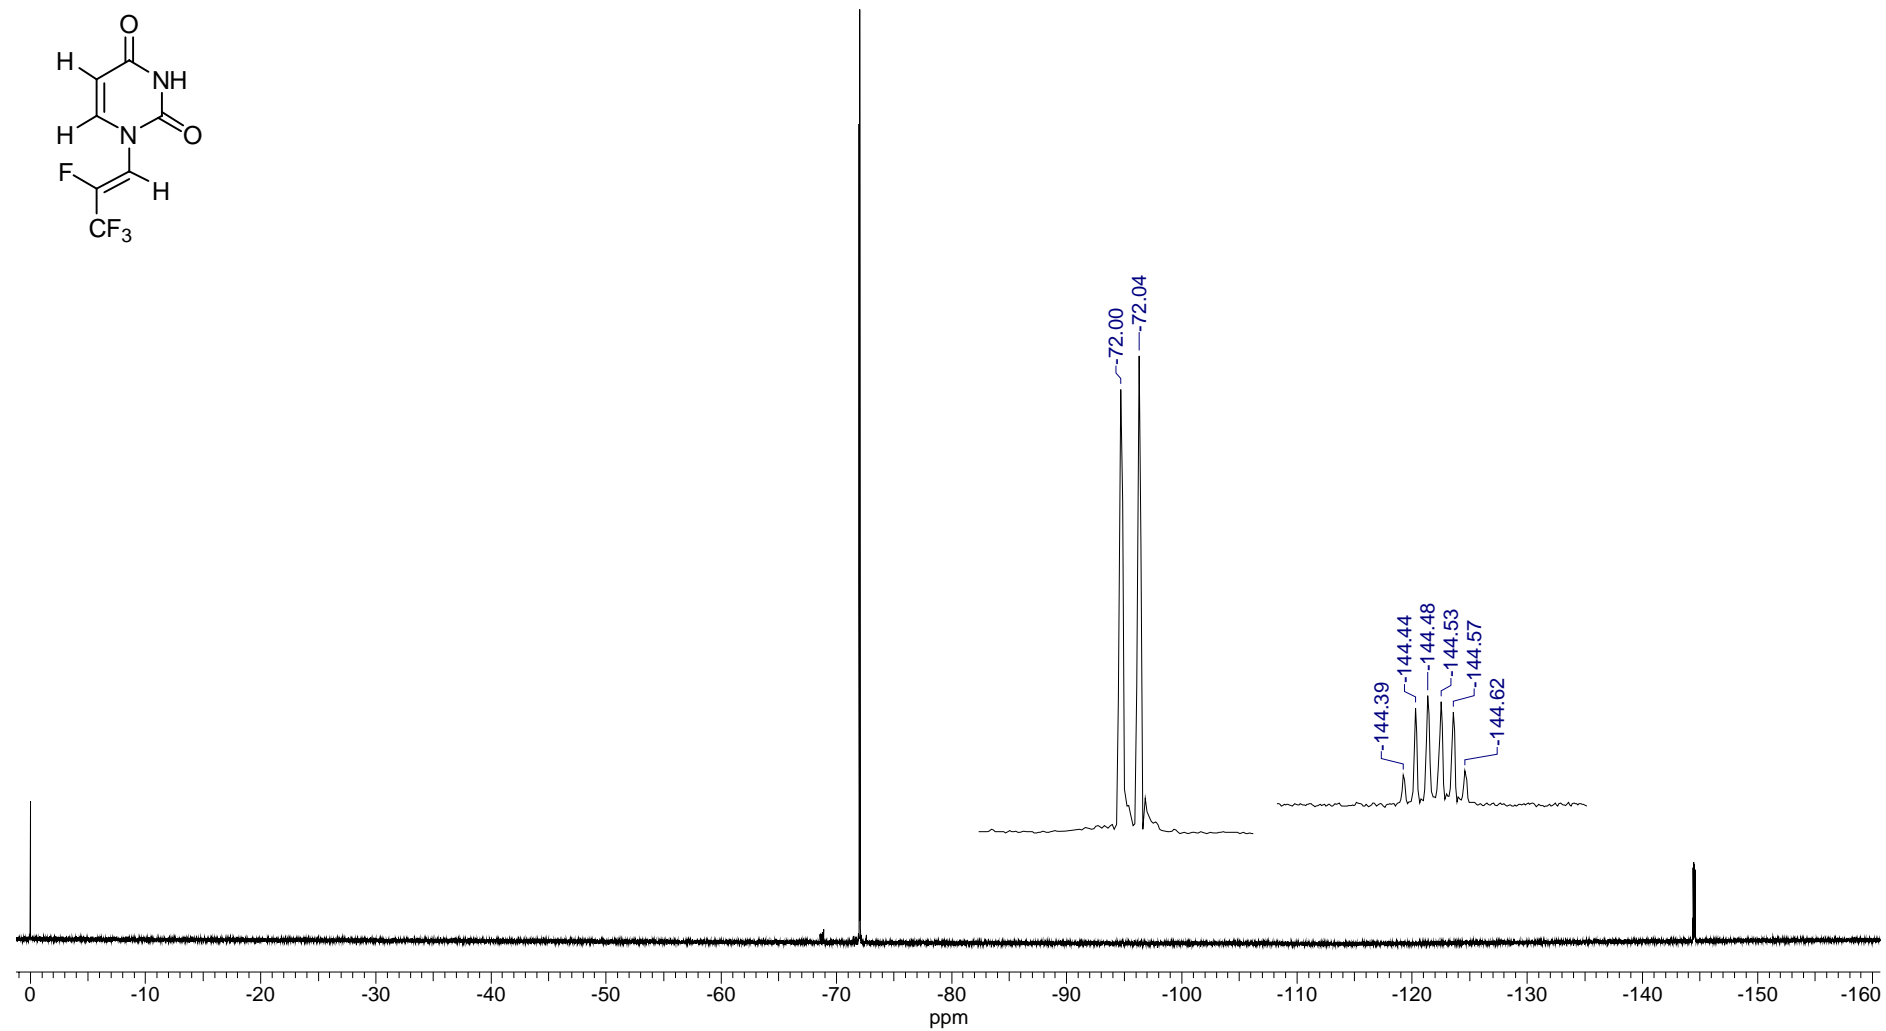

**Compound (E)-2c**

$^{19}\text{F}$  NMR, 282 MHz,  $\text{CDCl}_3$

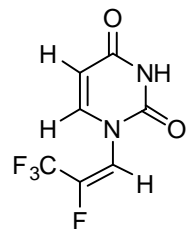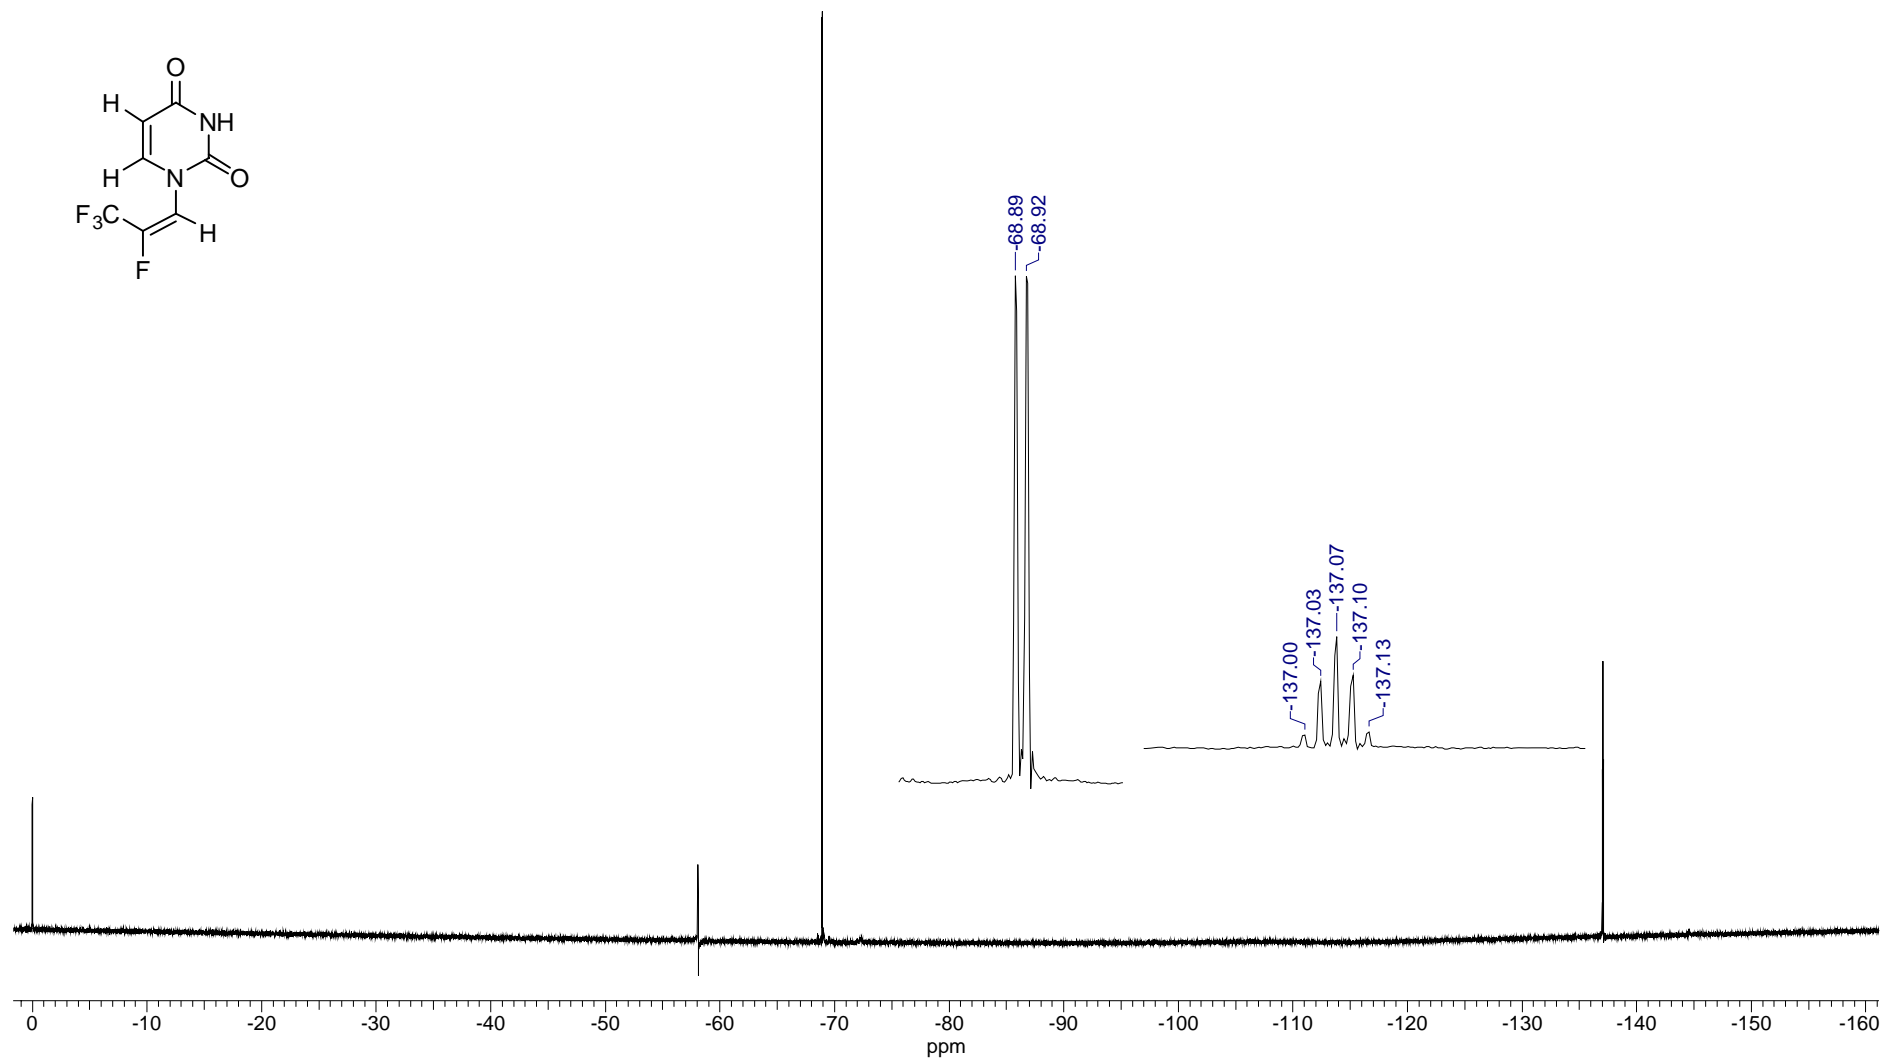

**Compounds (Z)-3c and (E)-3c**

$^1\text{H}$  NMR, 300 MHz,  $\text{DMSO-d}_6$

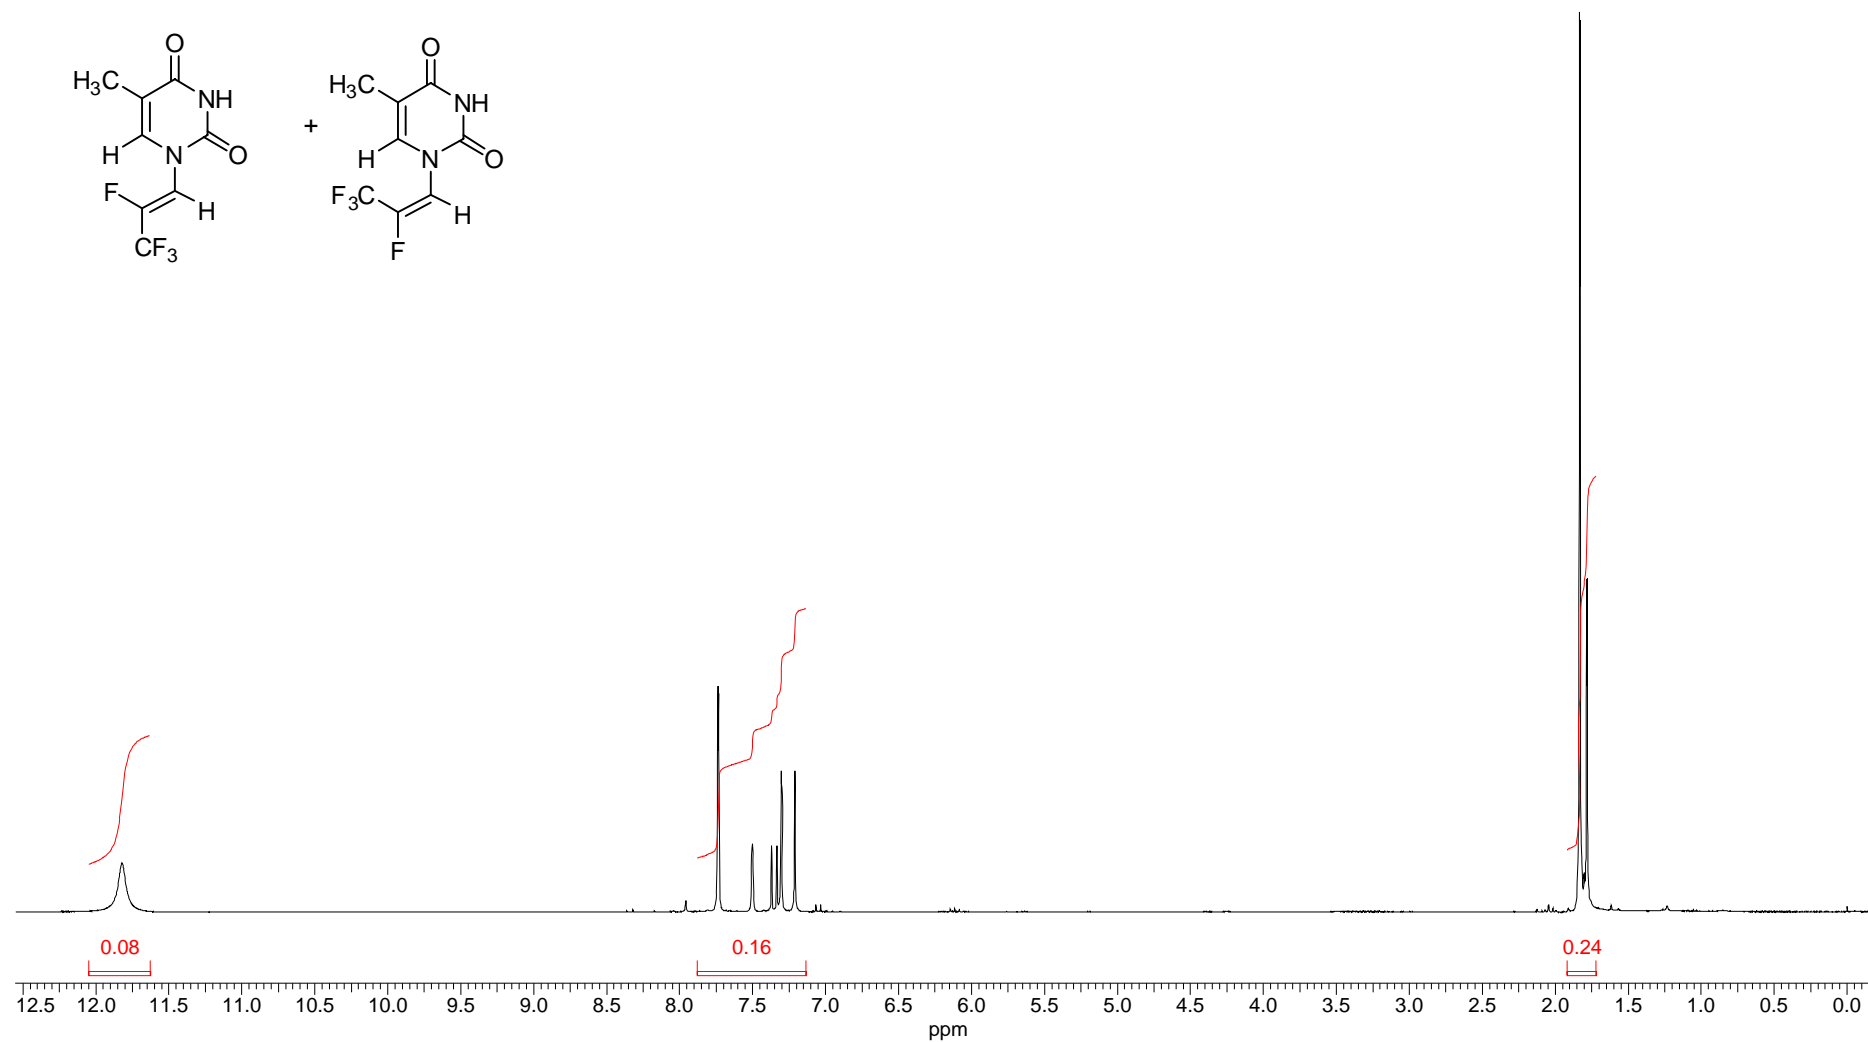

**Compound (Z)-3c**

<sup>1</sup>H NMR, 300 MHz, CDCl<sub>3</sub>

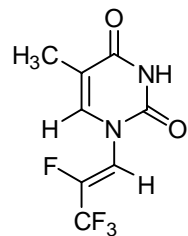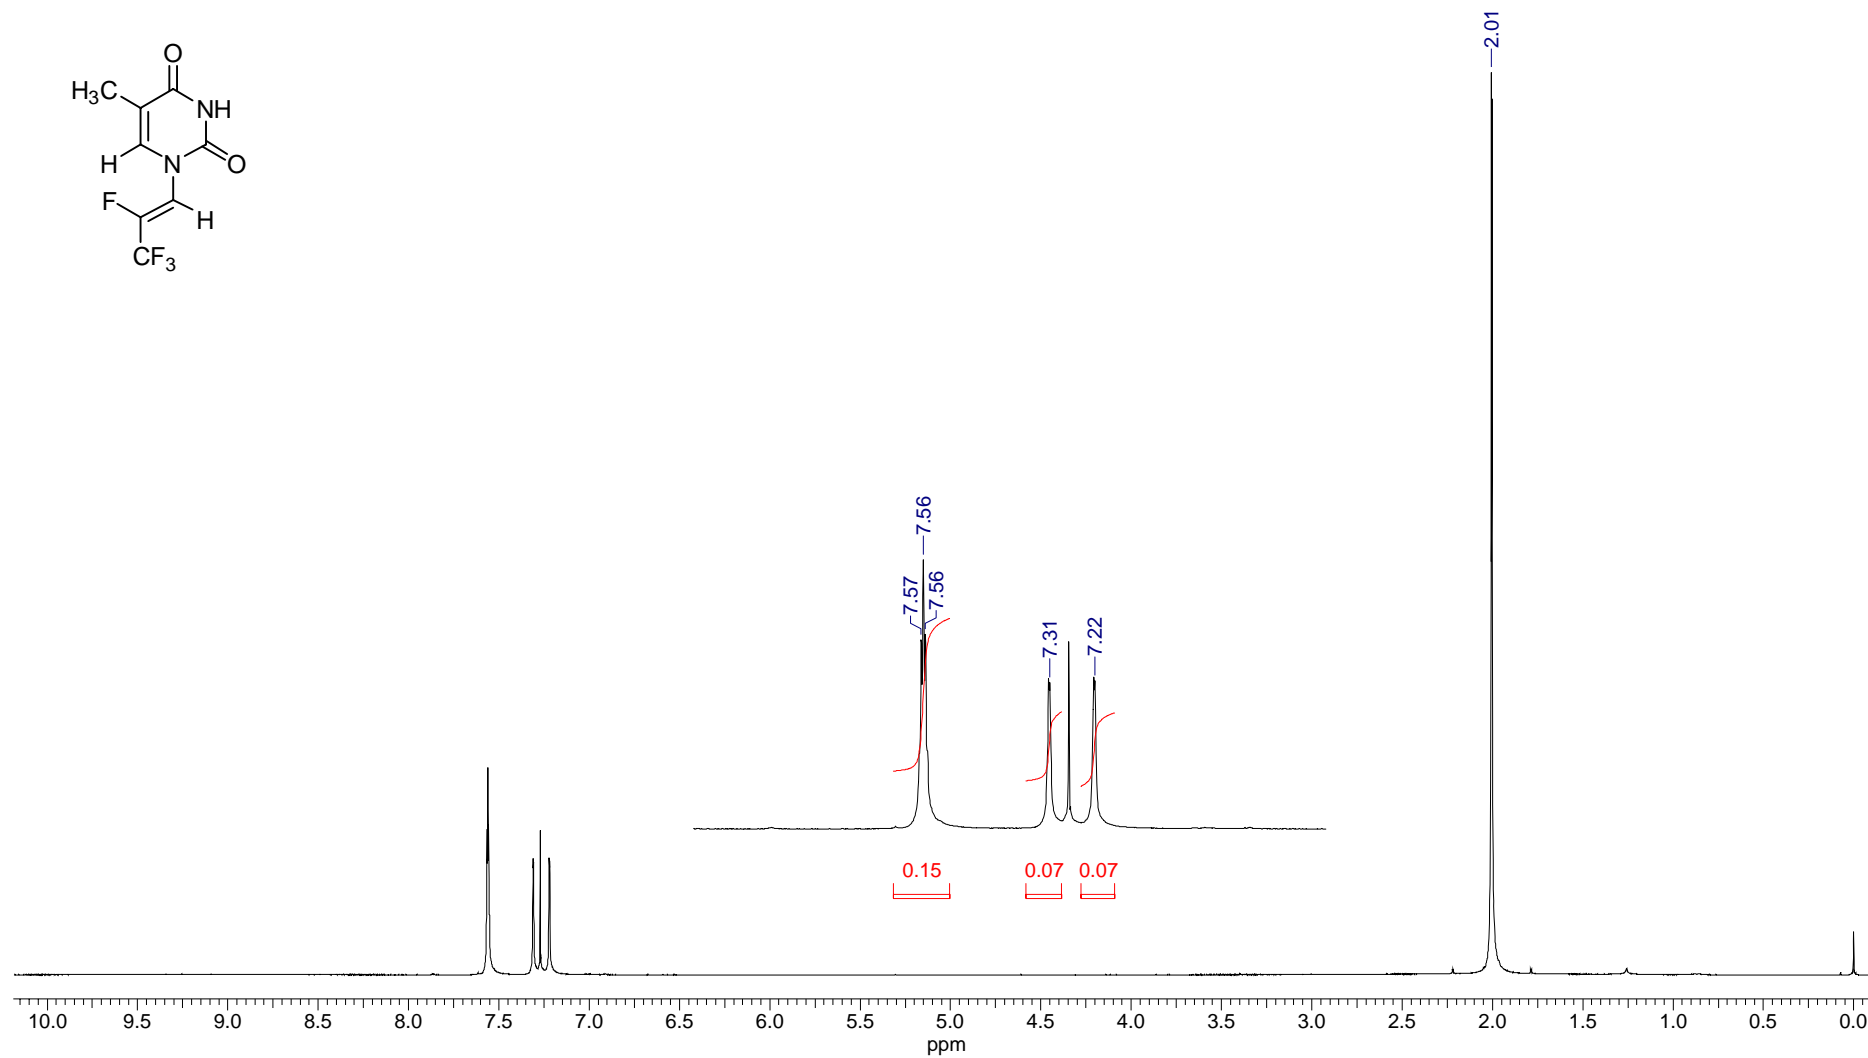

**Compound (E)-3c**

$^1\text{H}$  NMR, 300 MHz,  $\text{CDCl}_3$

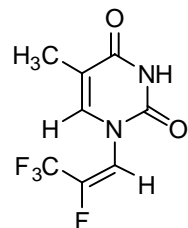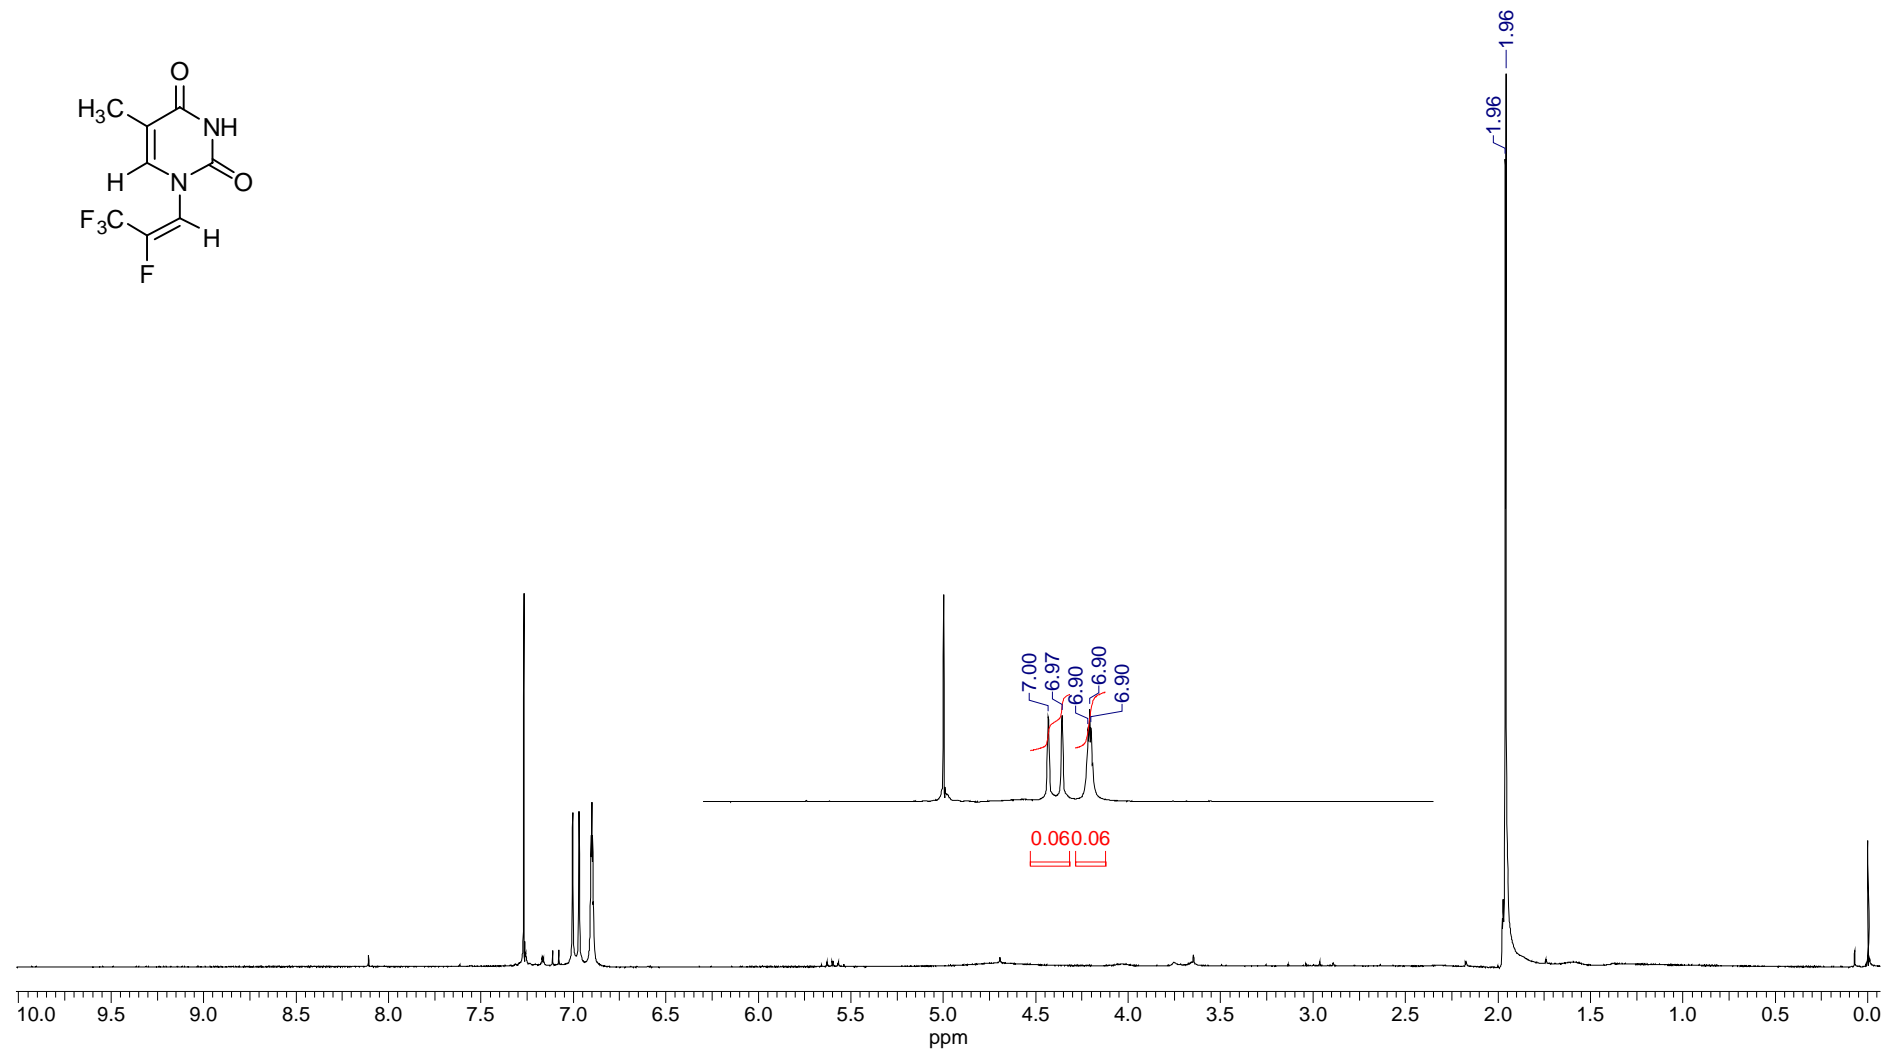

**Compound (Z)-3c**

$^{19}\text{F}$  NMR, 282 MHz,  $\text{CDCl}_3$

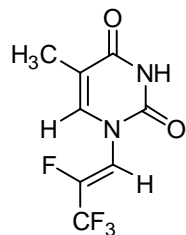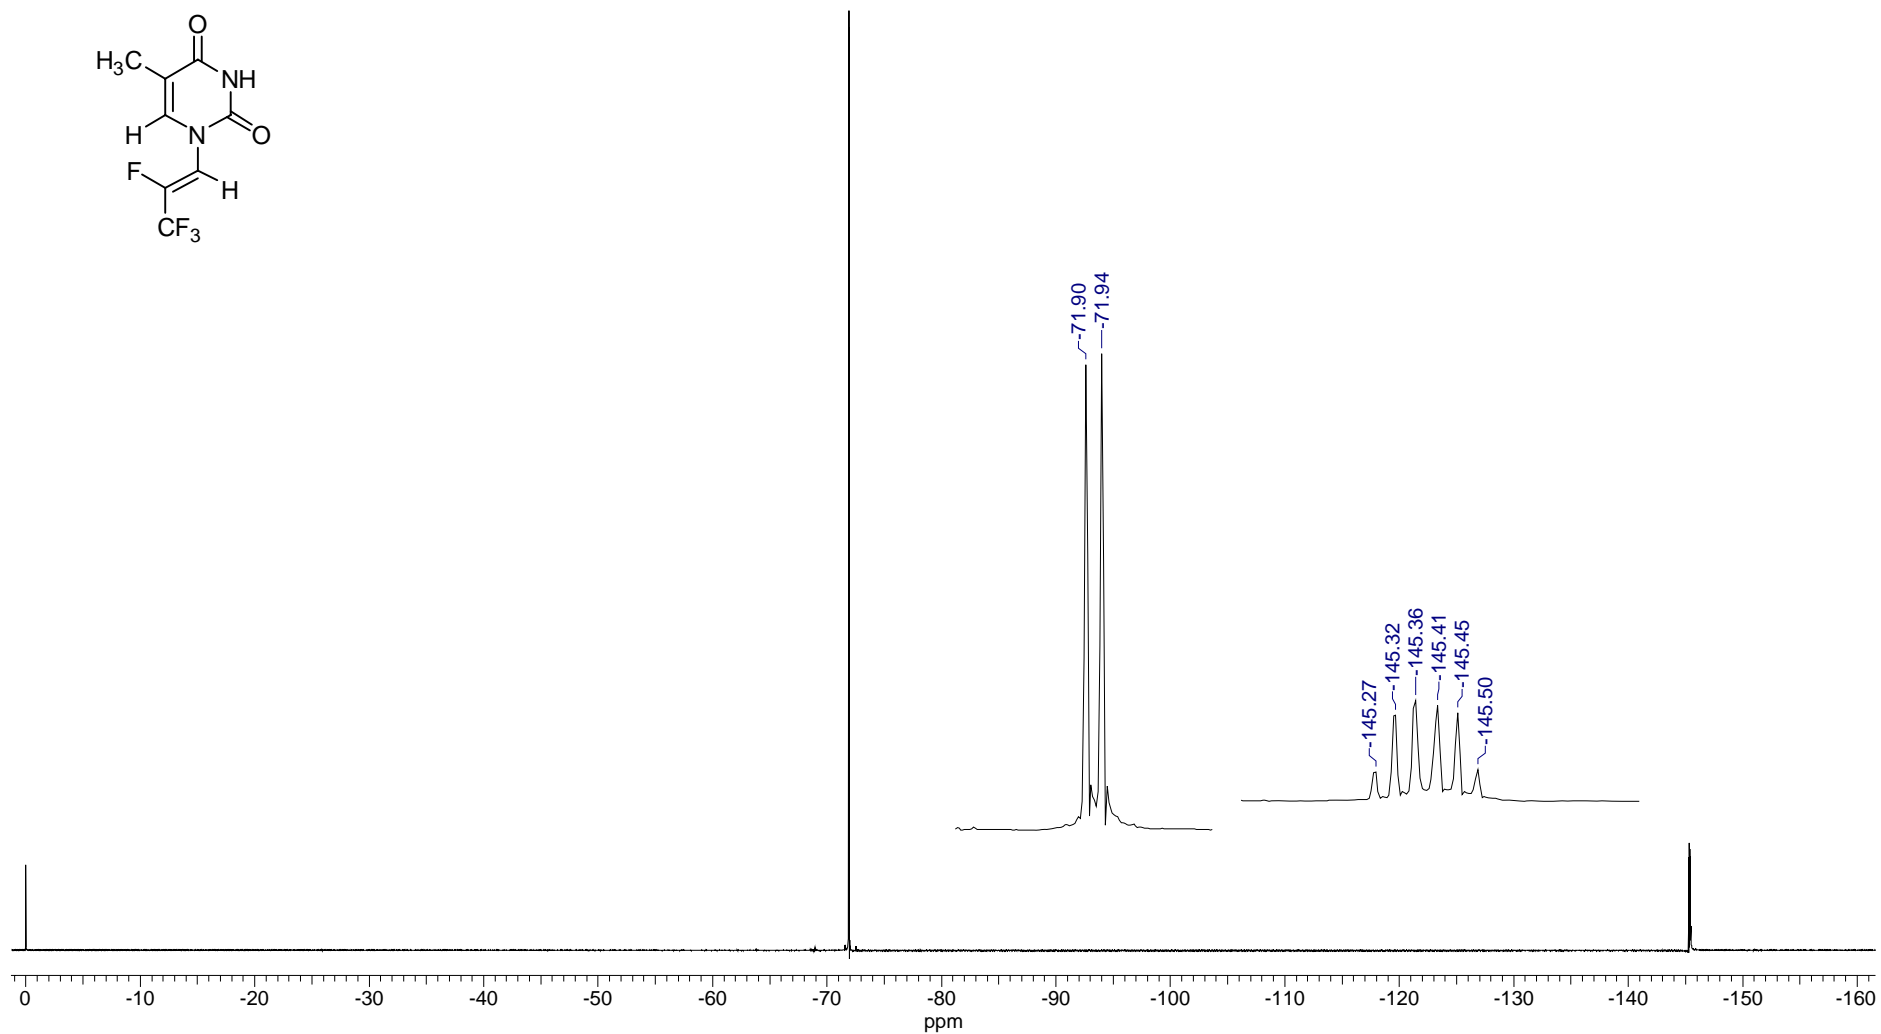

**Compound (E)-3c**

$^{19}\text{F}$  NMR, 282 MHz,  $\text{CDCl}_3$

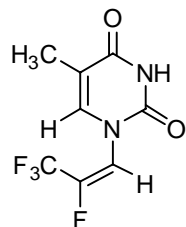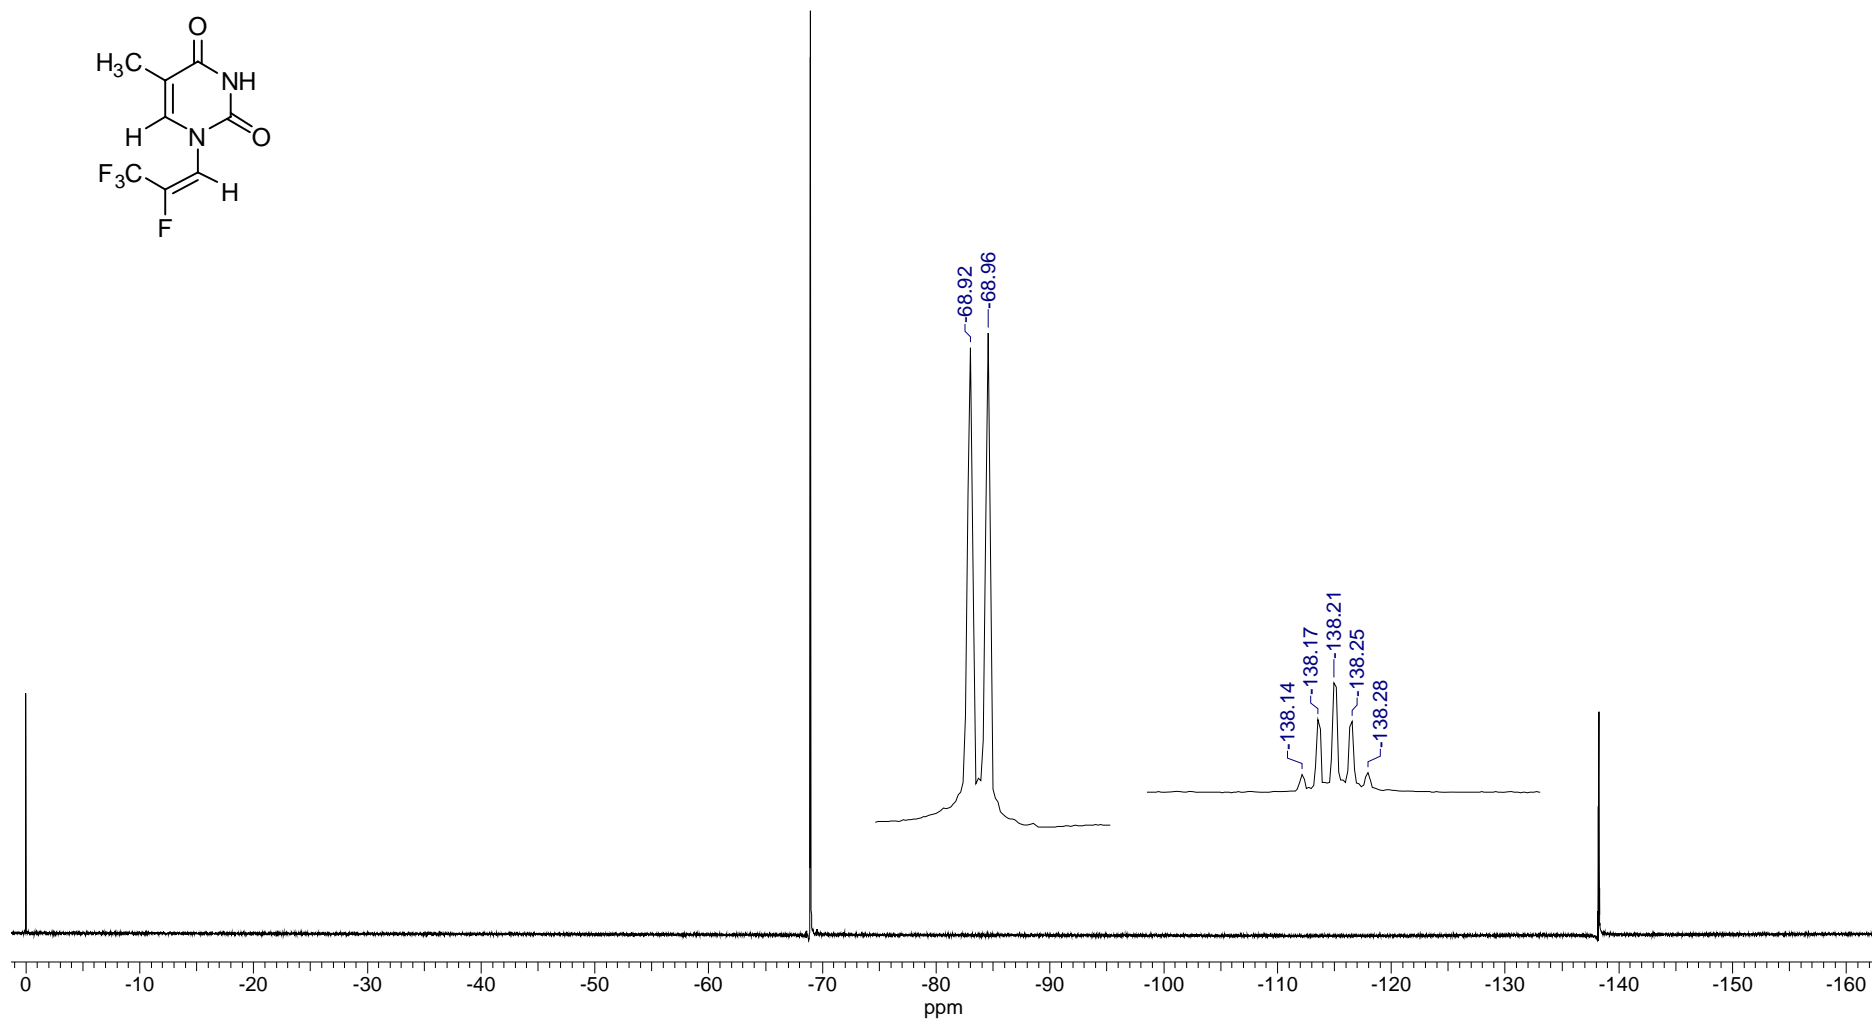

**Compounds (Z)-4c and (E)-4c**



$^1\text{H}$  NMR, 300 MHz,  $\text{DMSO-d}_6$

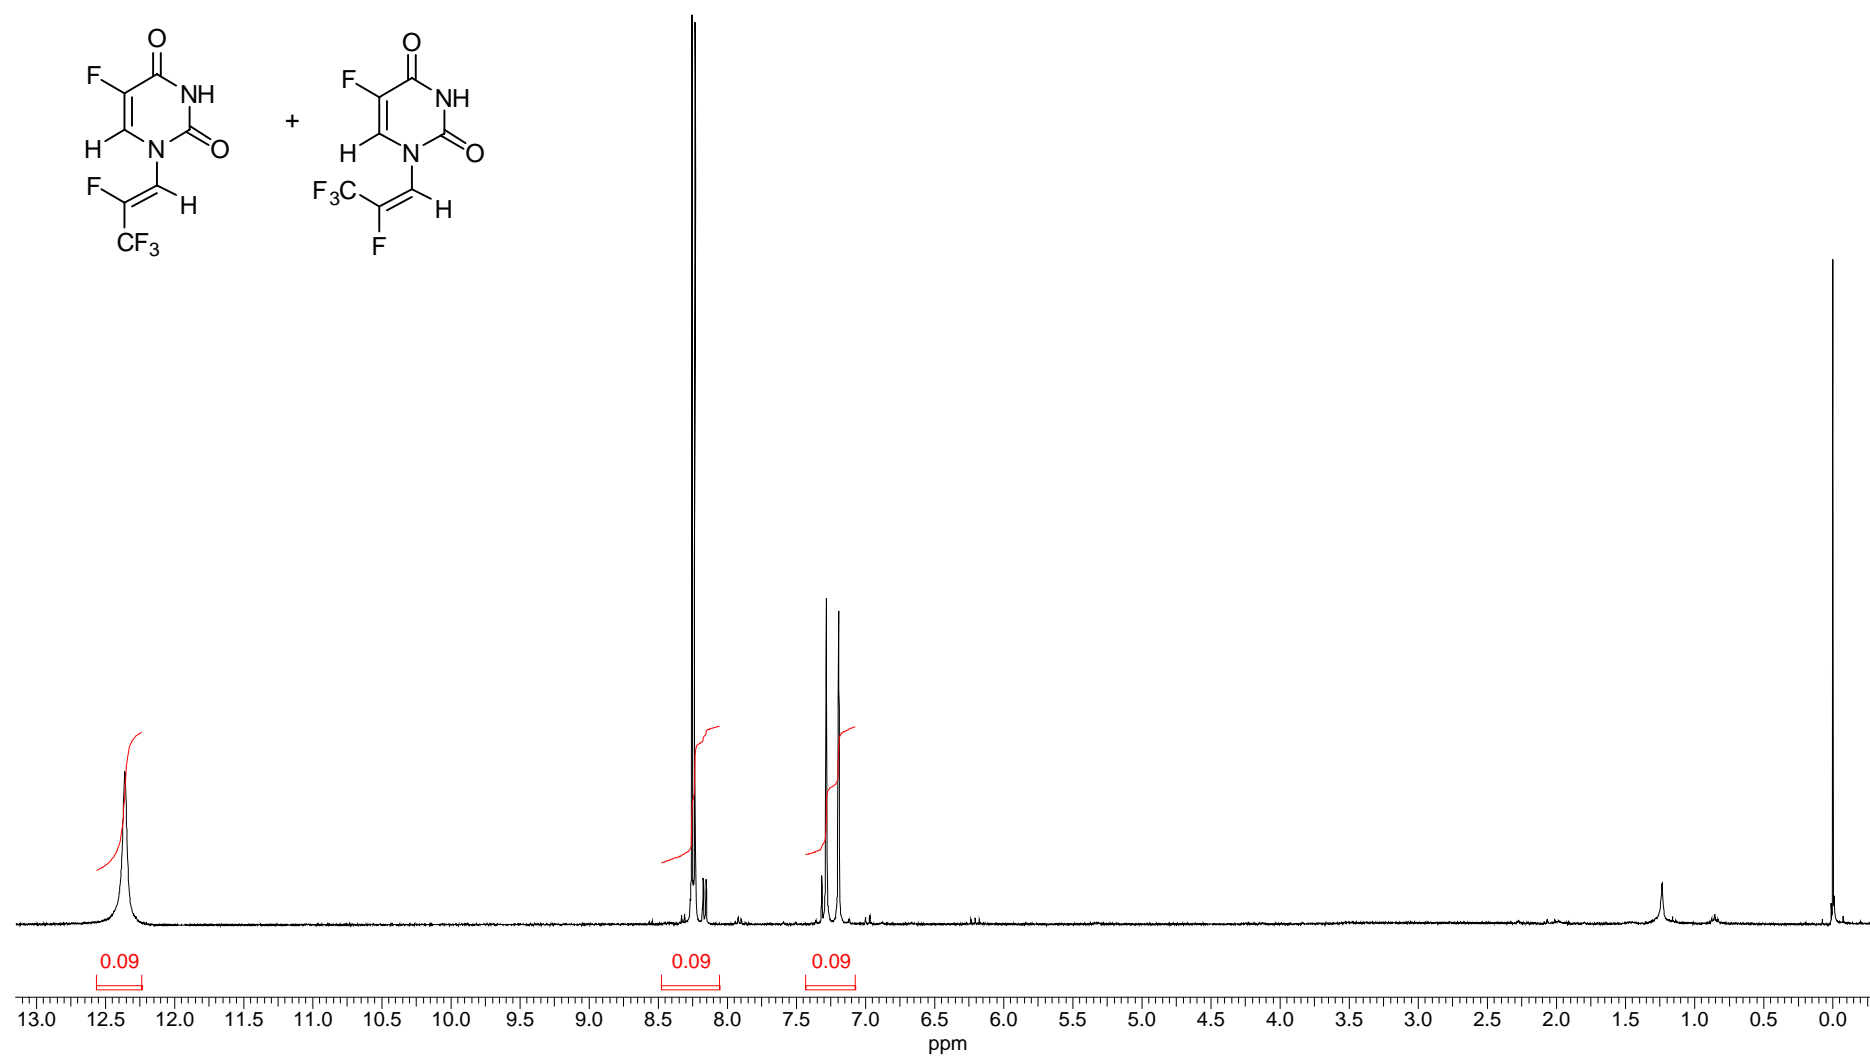

### Compound (Z)-4c

$^1\text{H}$  NMR, 300 MHz,  $\text{CDCl}_3$

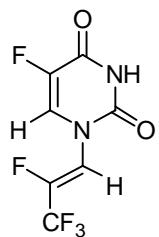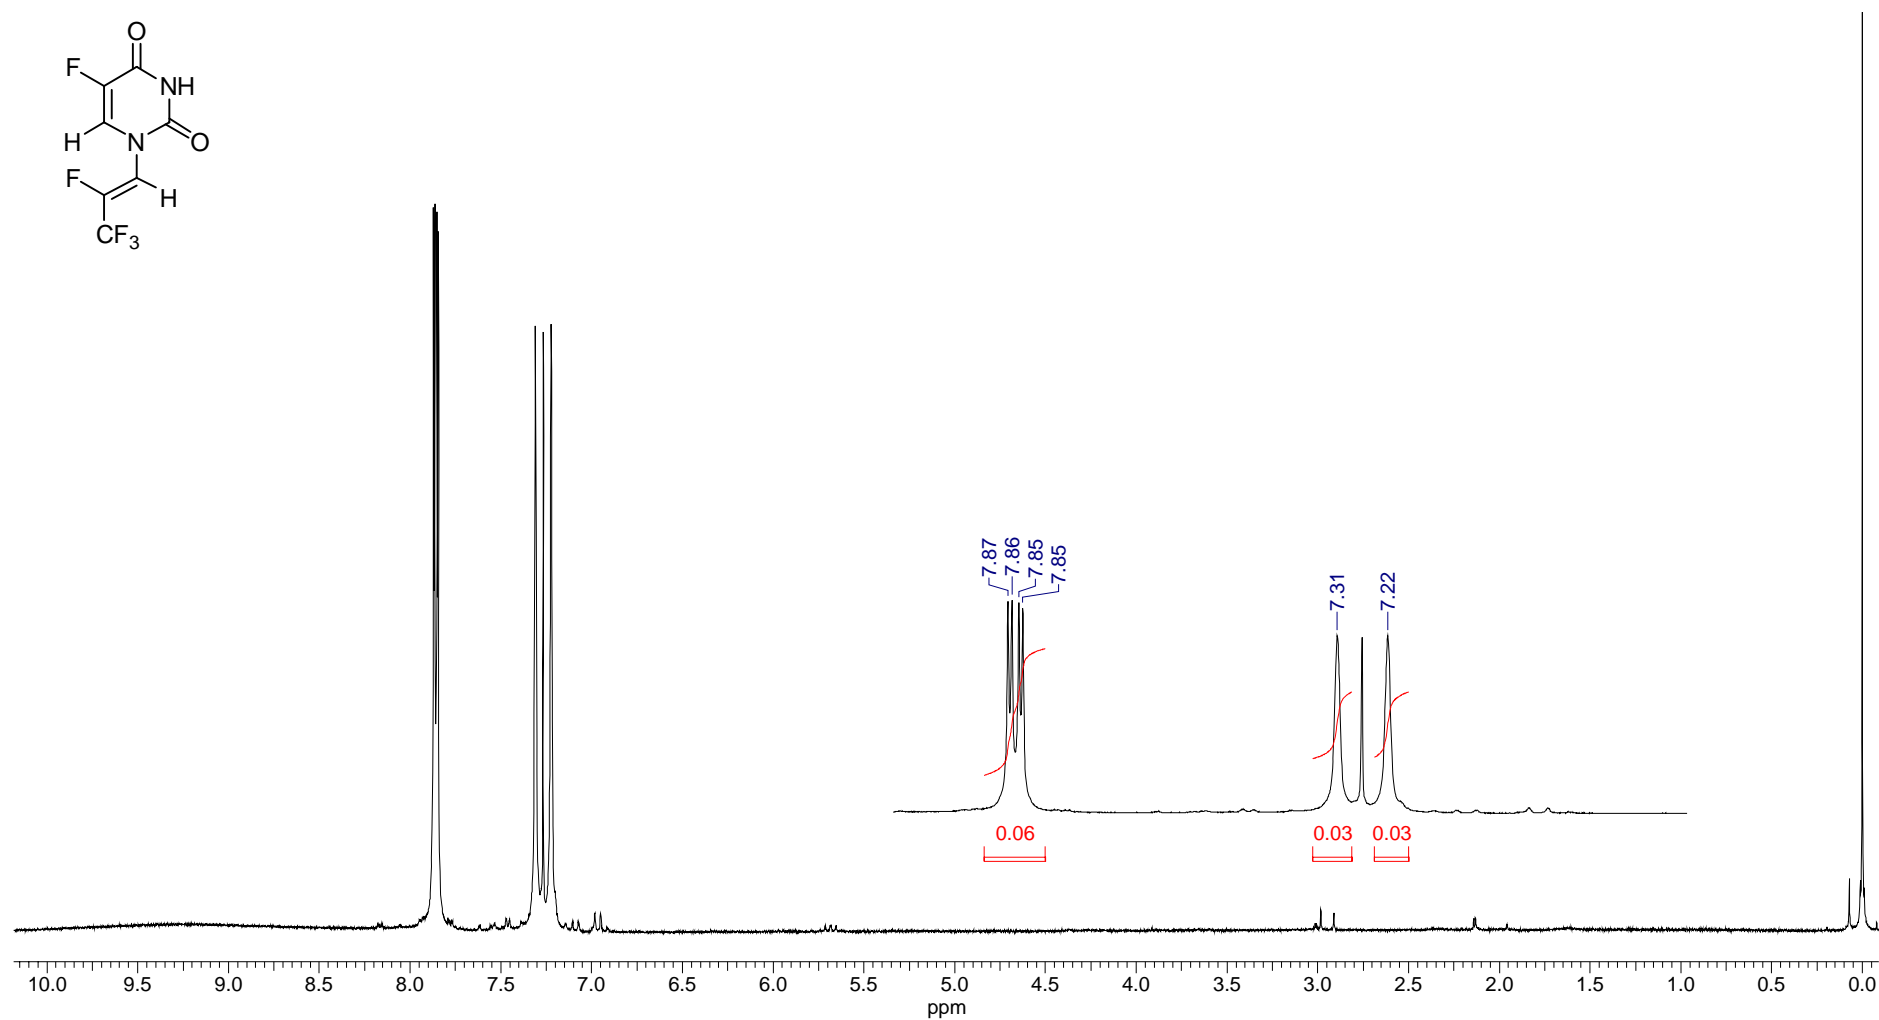

**Compound (E)-4c**

$^1\text{H}$  NMR, 300 MHz,  $\text{CDCl}_3$

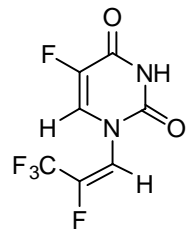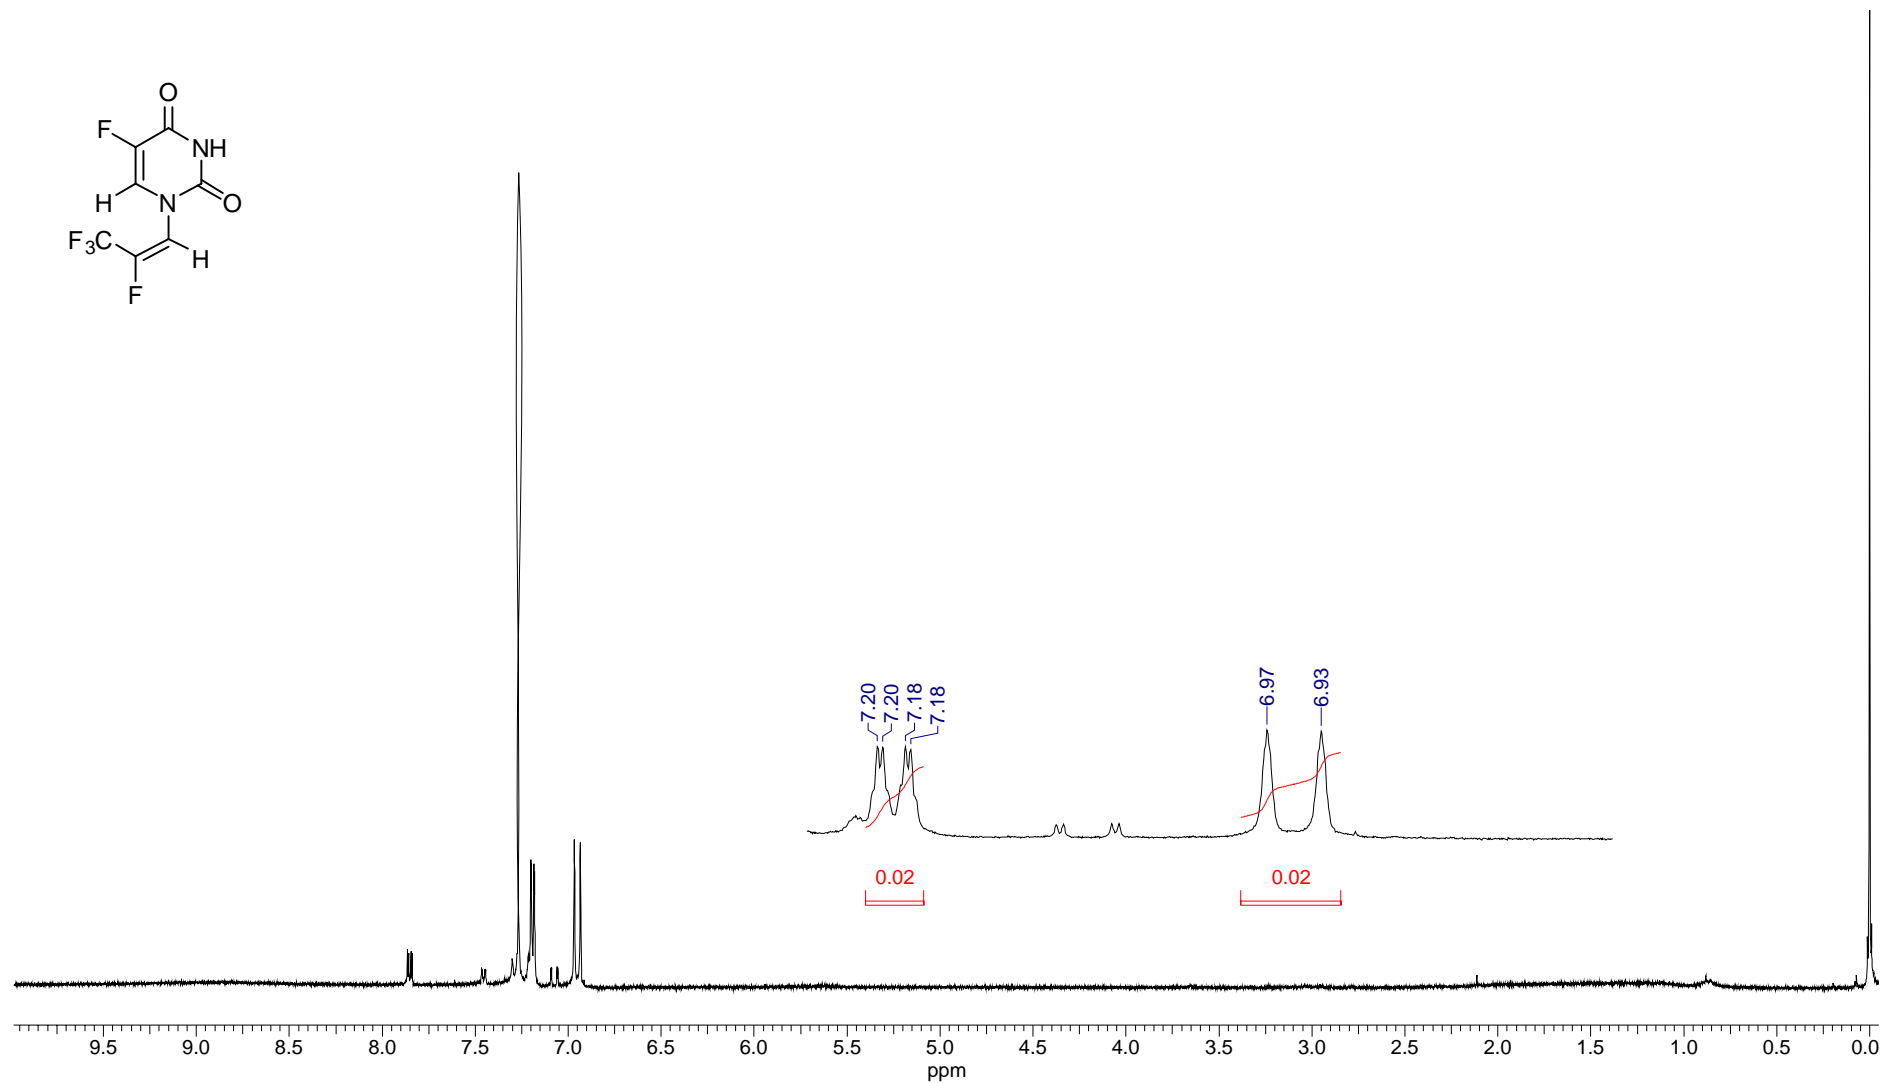

**Compound (Z)-4c**

$^{19}\text{F}$  NMR, 282 MHz,  $\text{CDCl}_3$

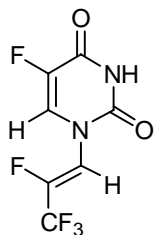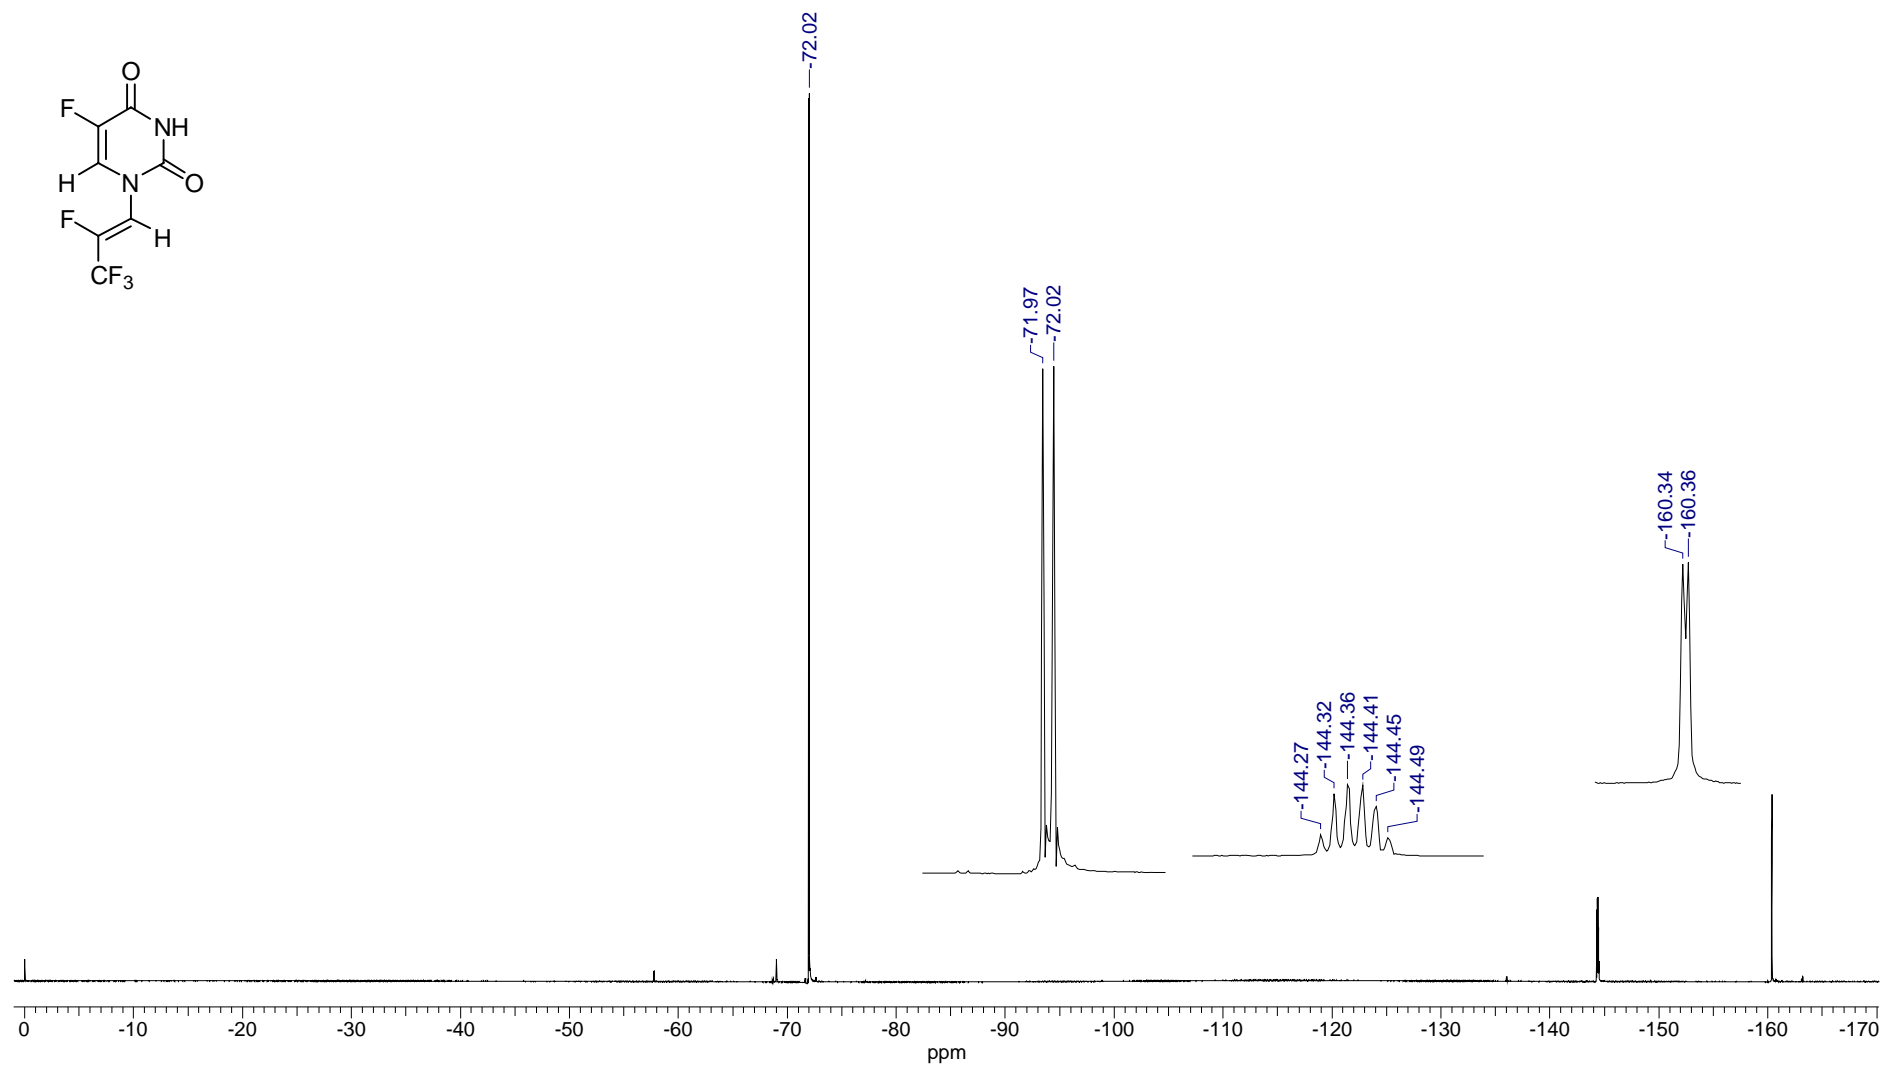

**Compound (E)-4c**

$^{19}\text{F}$  NMR, 282 MHz,  $\text{CDCl}_3$

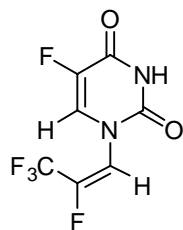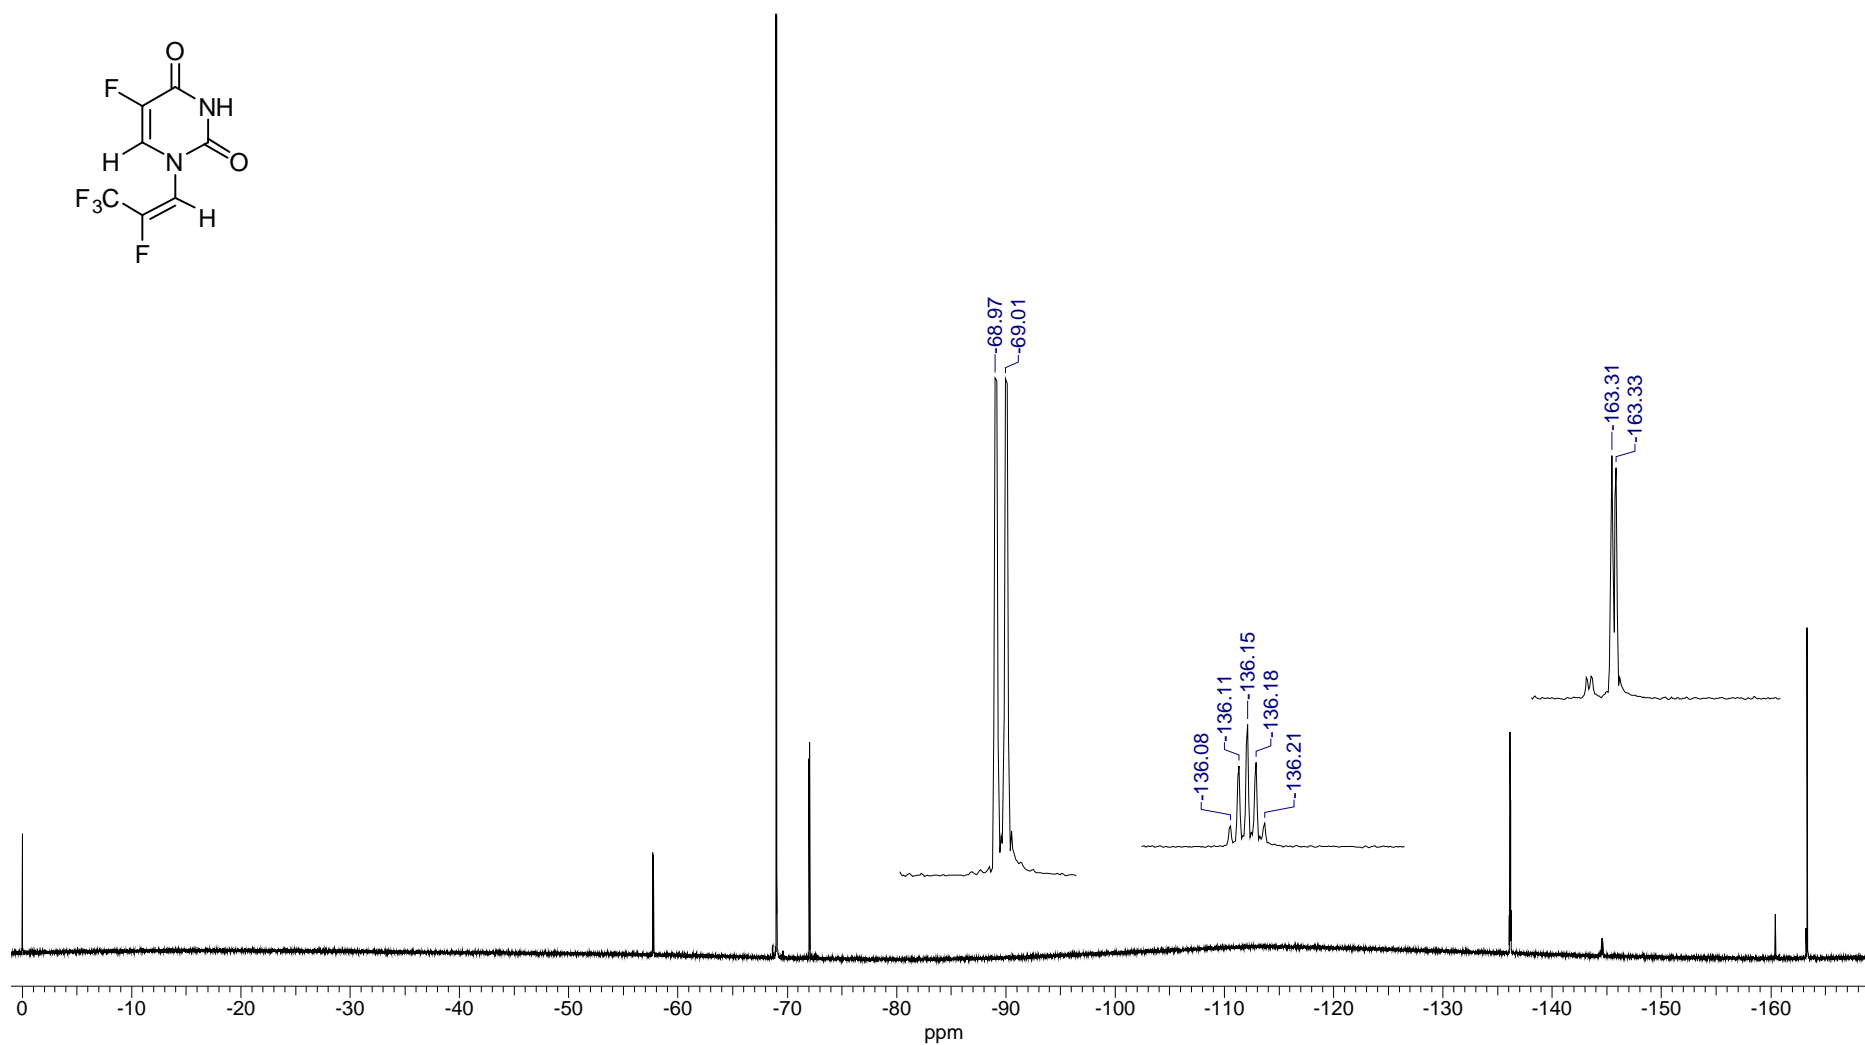

Compounds (Z)-6c and (E)-6c

$^1\text{H}$  NMR, 300 MHz,  $\text{CDCl}_3$

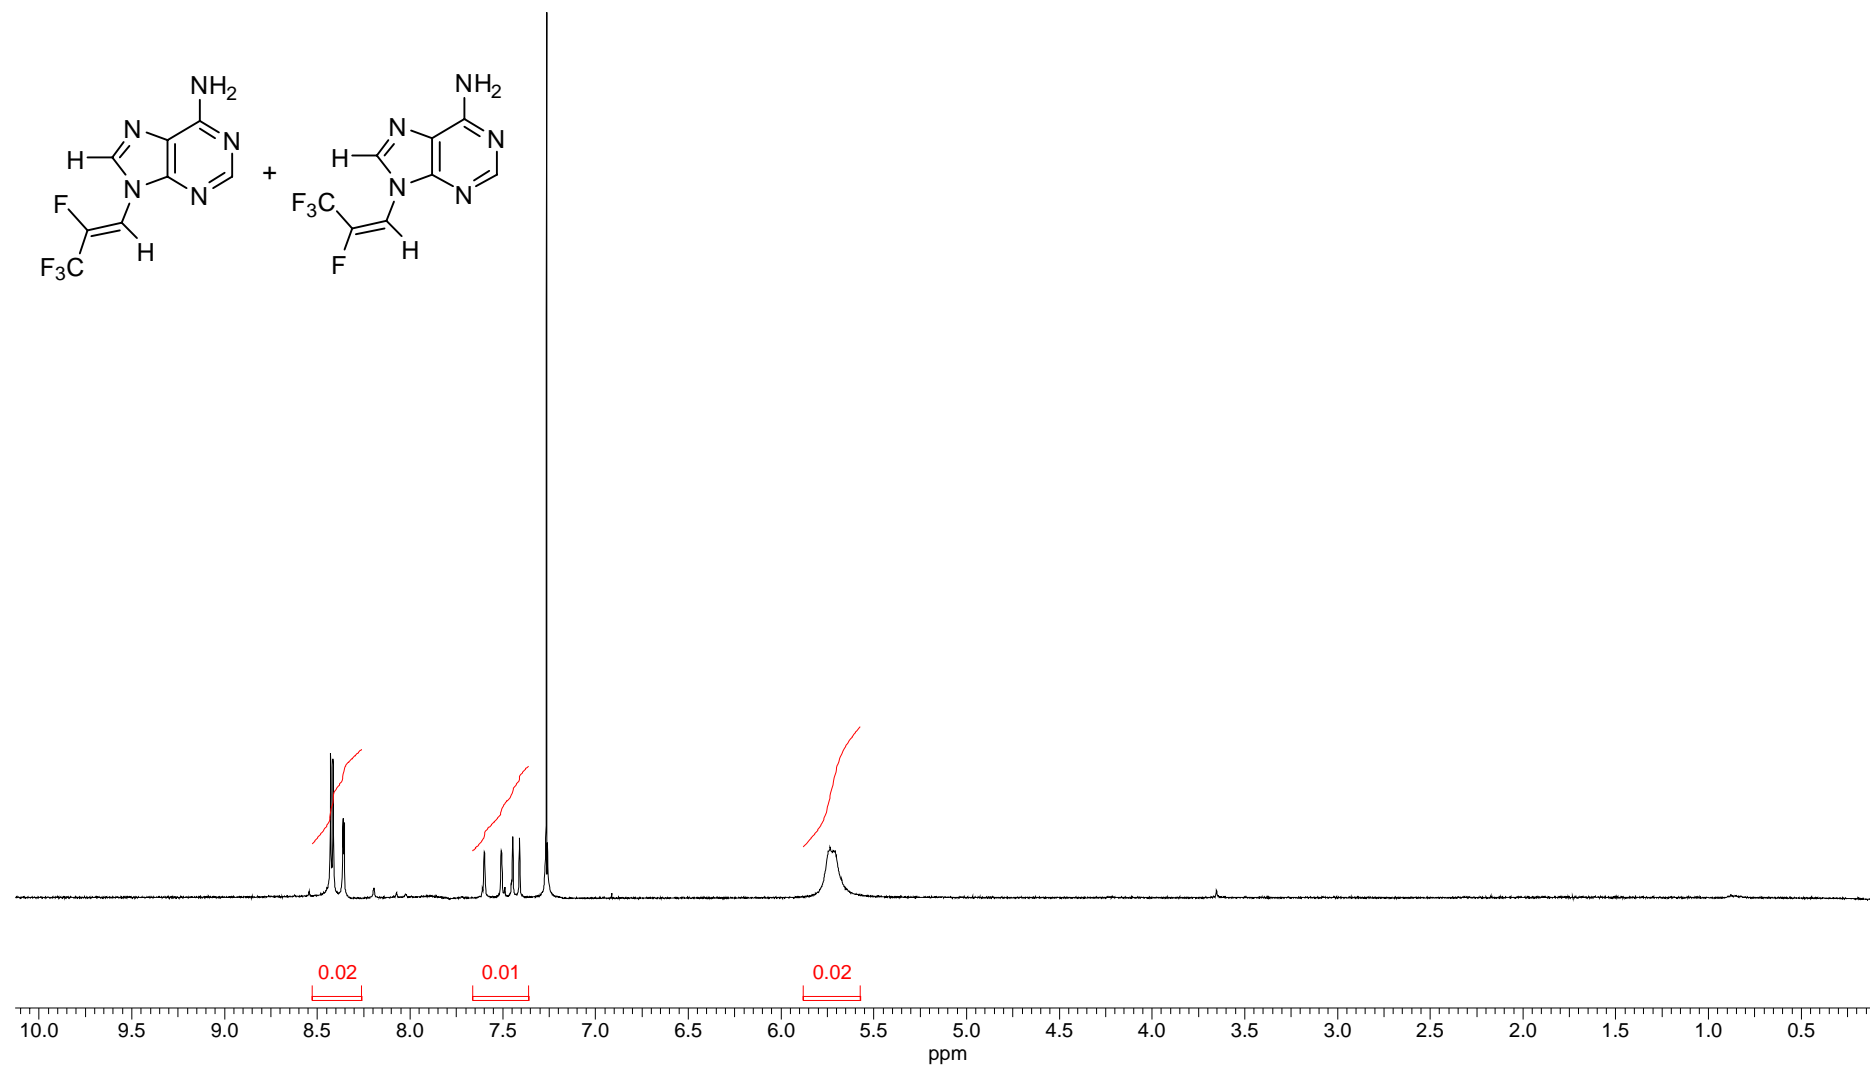



**Compound (Z)-6c**

<sup>1</sup>H NMR, 300 MHz, DMSO-d<sub>6</sub>

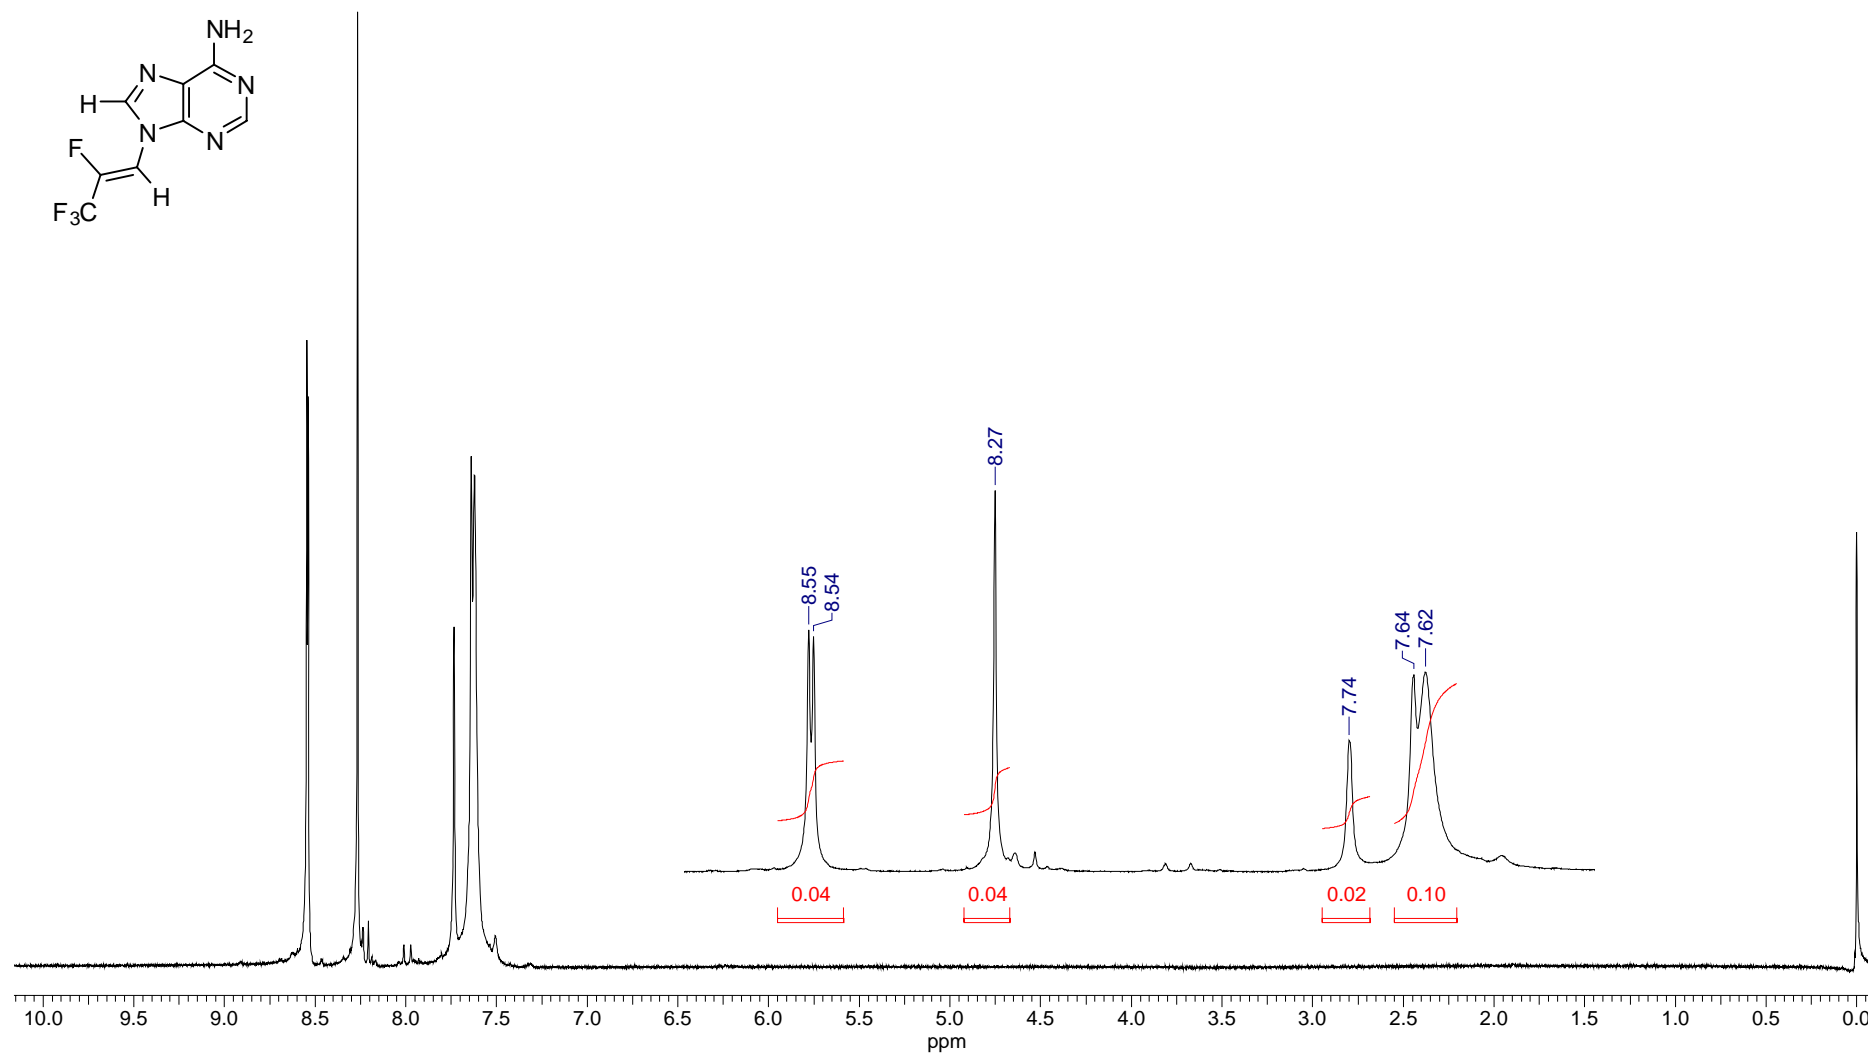

**Compound (E)-6c**

$^1\text{H}$  NMR, 300 MHz, DMSO- $d_6$

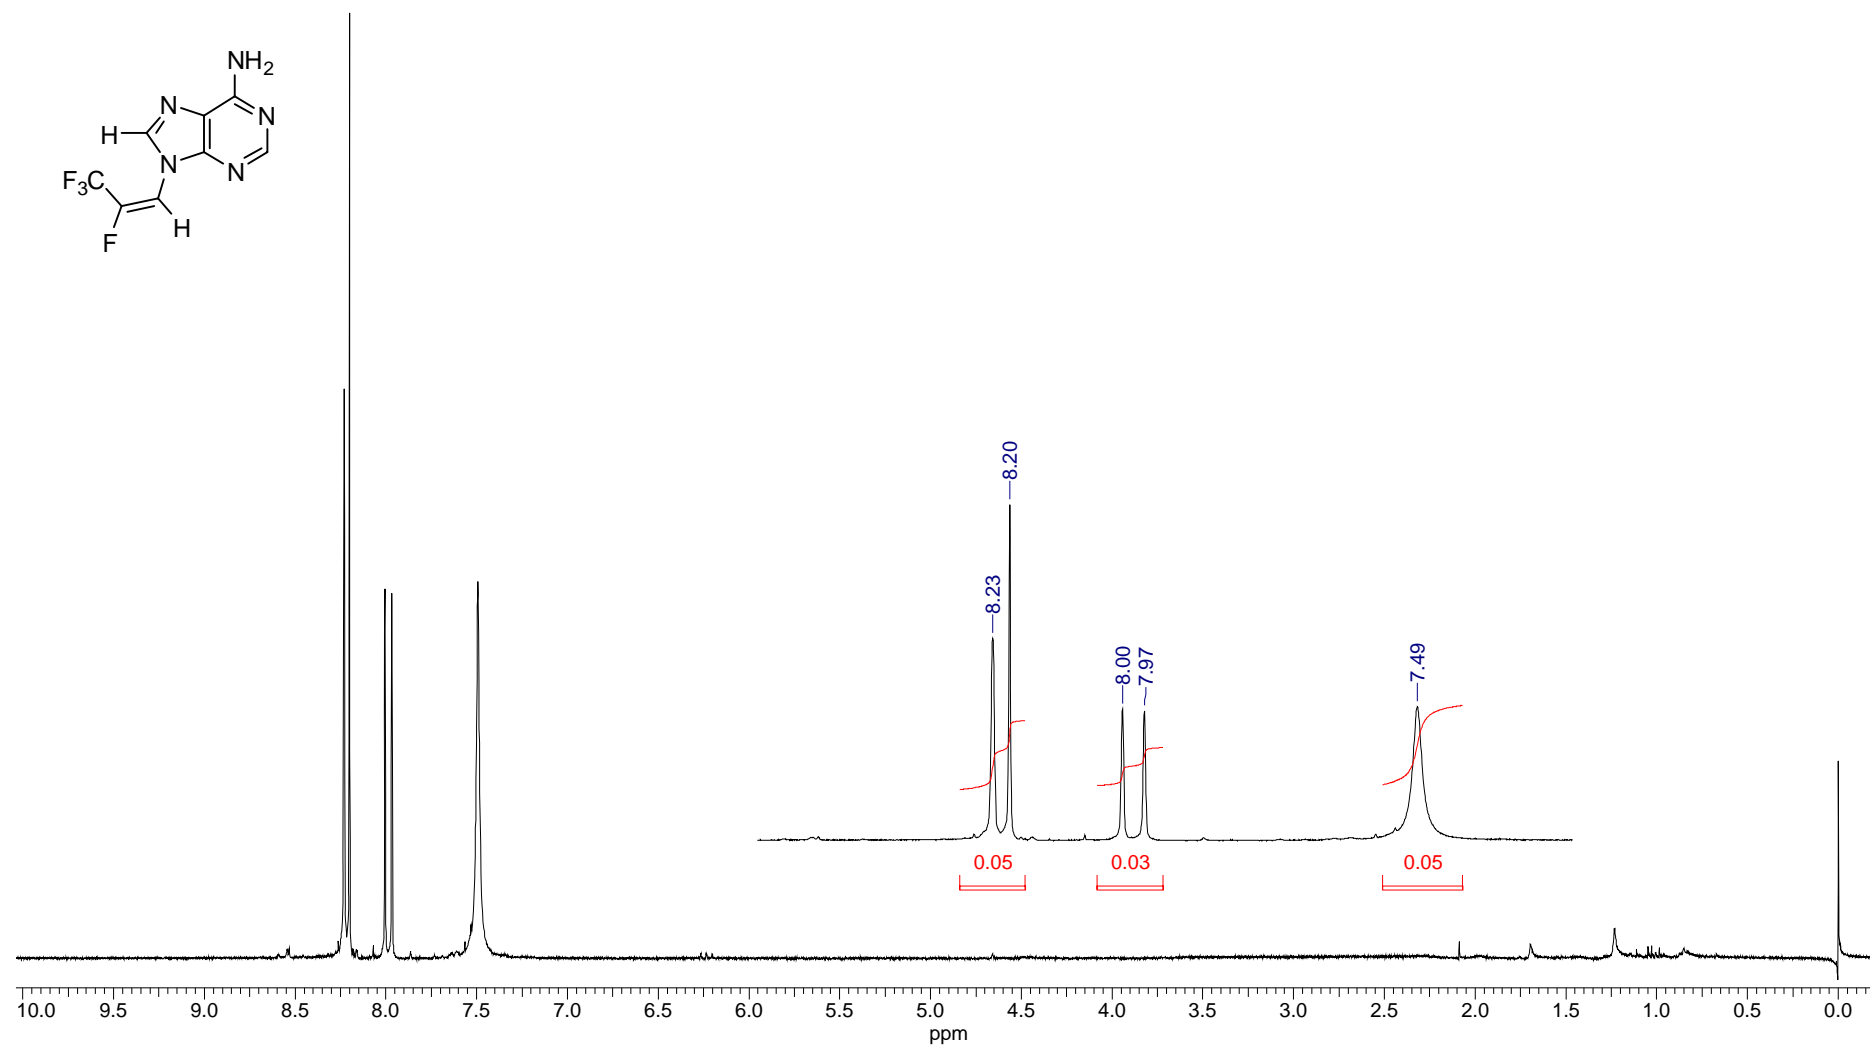

**Compound (Z)-6c**

$^{19}\text{F}$  NMR, 282MHz, DMSO- $\text{d}_6$

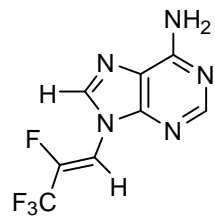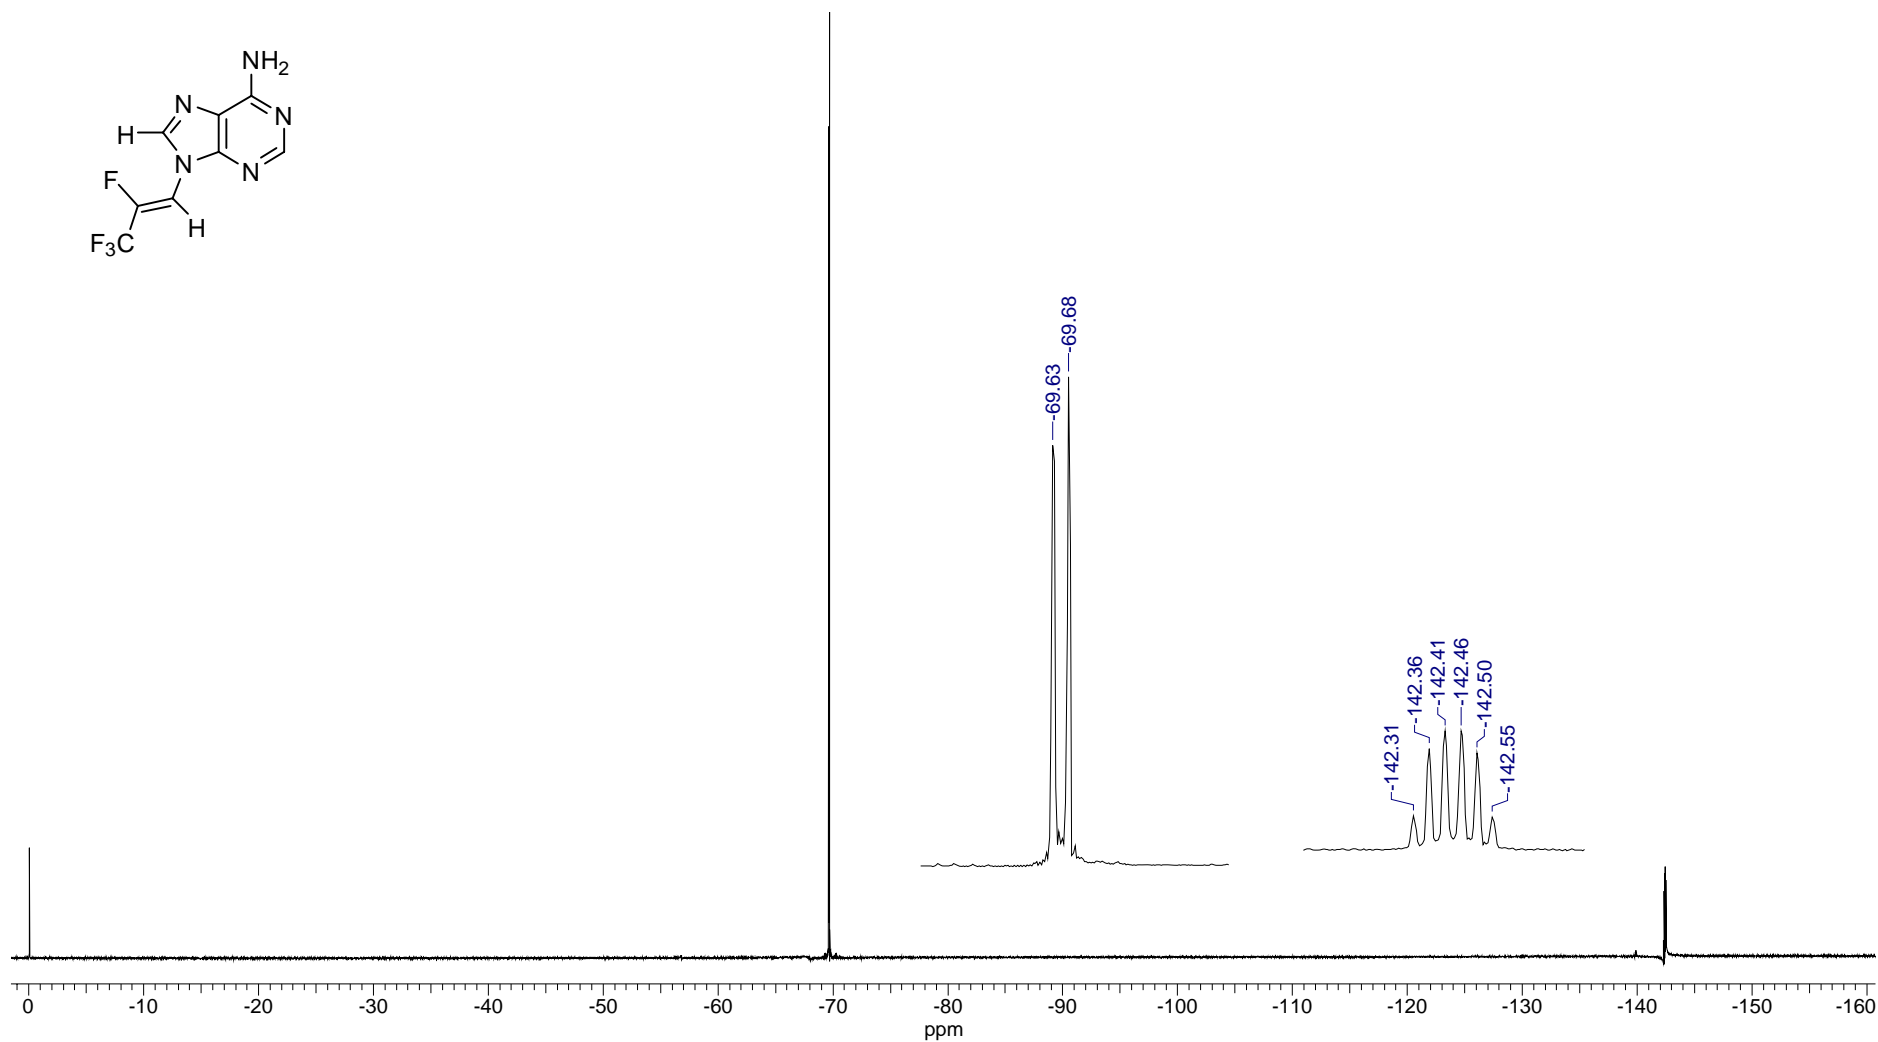

**Compound (E)-6c**

$^{19}\text{F}$  NMR, 282 MHz, DMSO- $d_6$

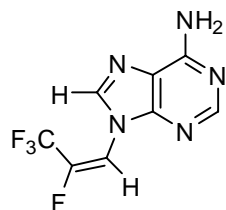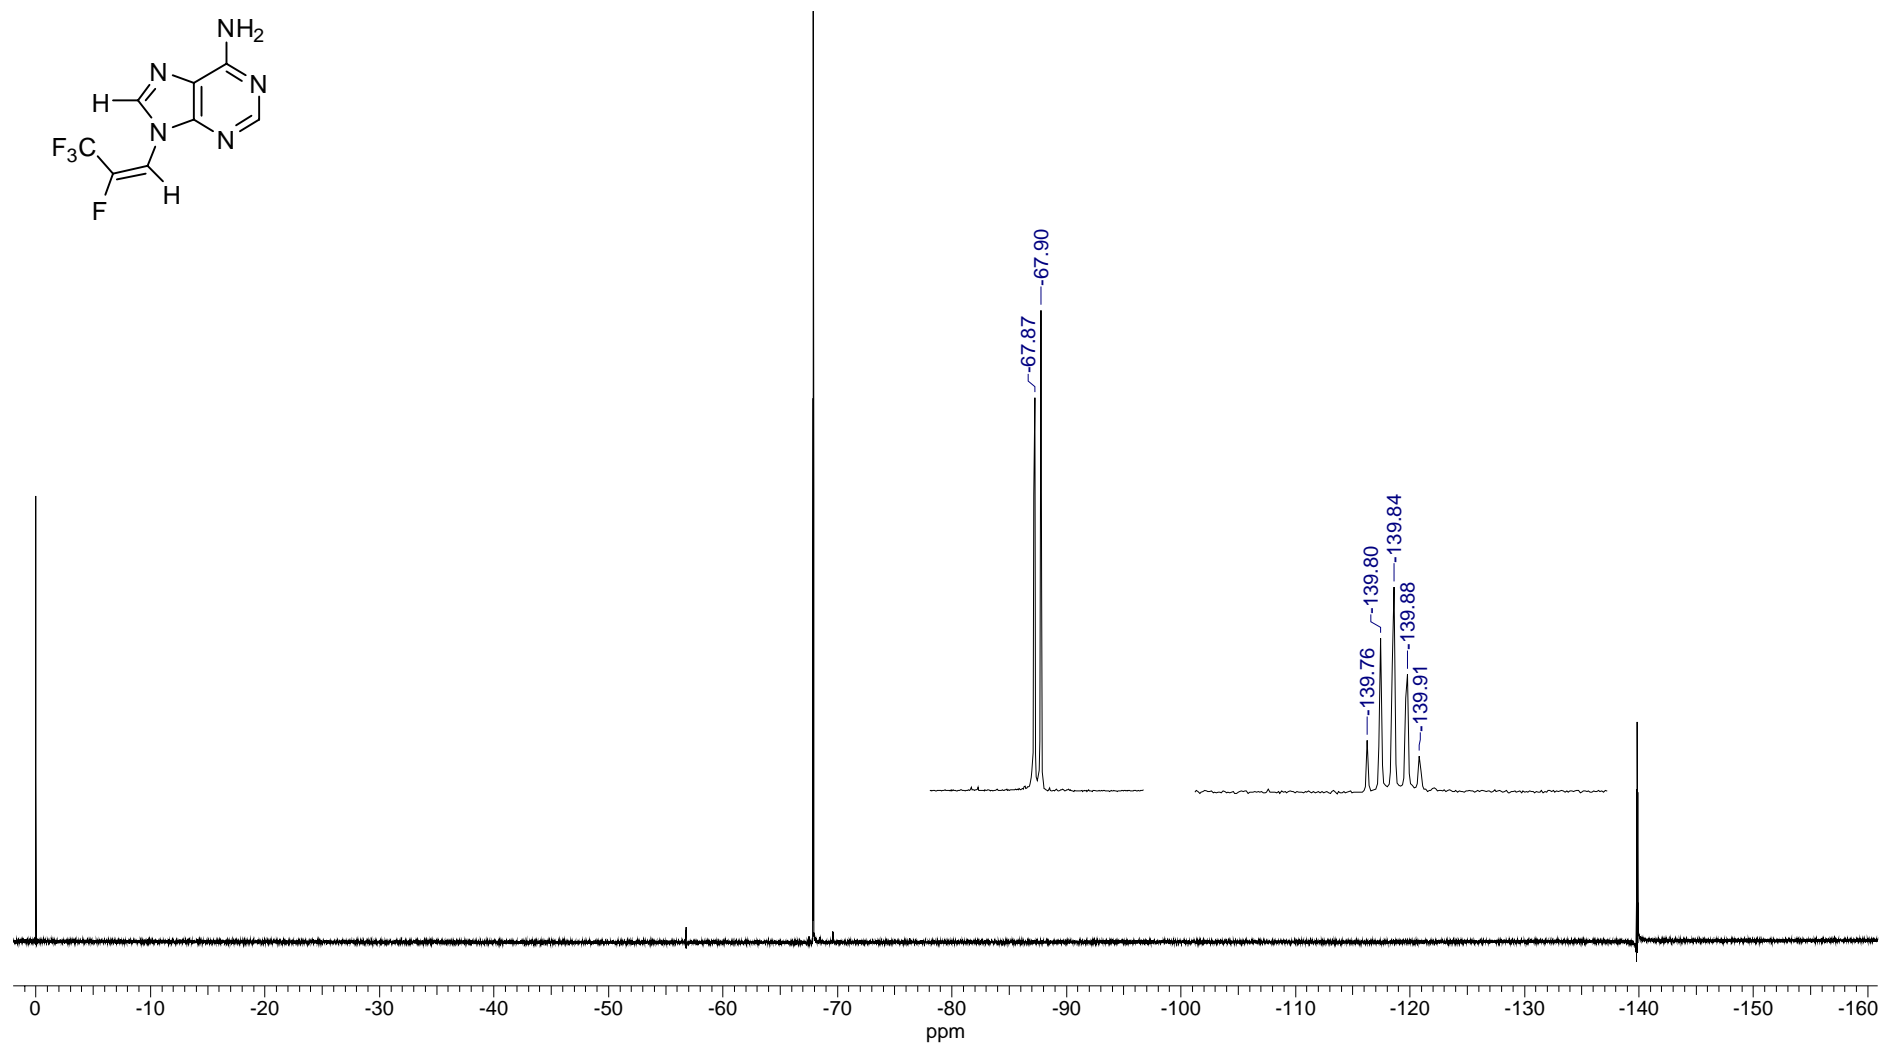

### Compounds (Z)-9c and (E)-9c

$^1\text{H}$  NMR, 300 MHz, DMSO- $d_6$

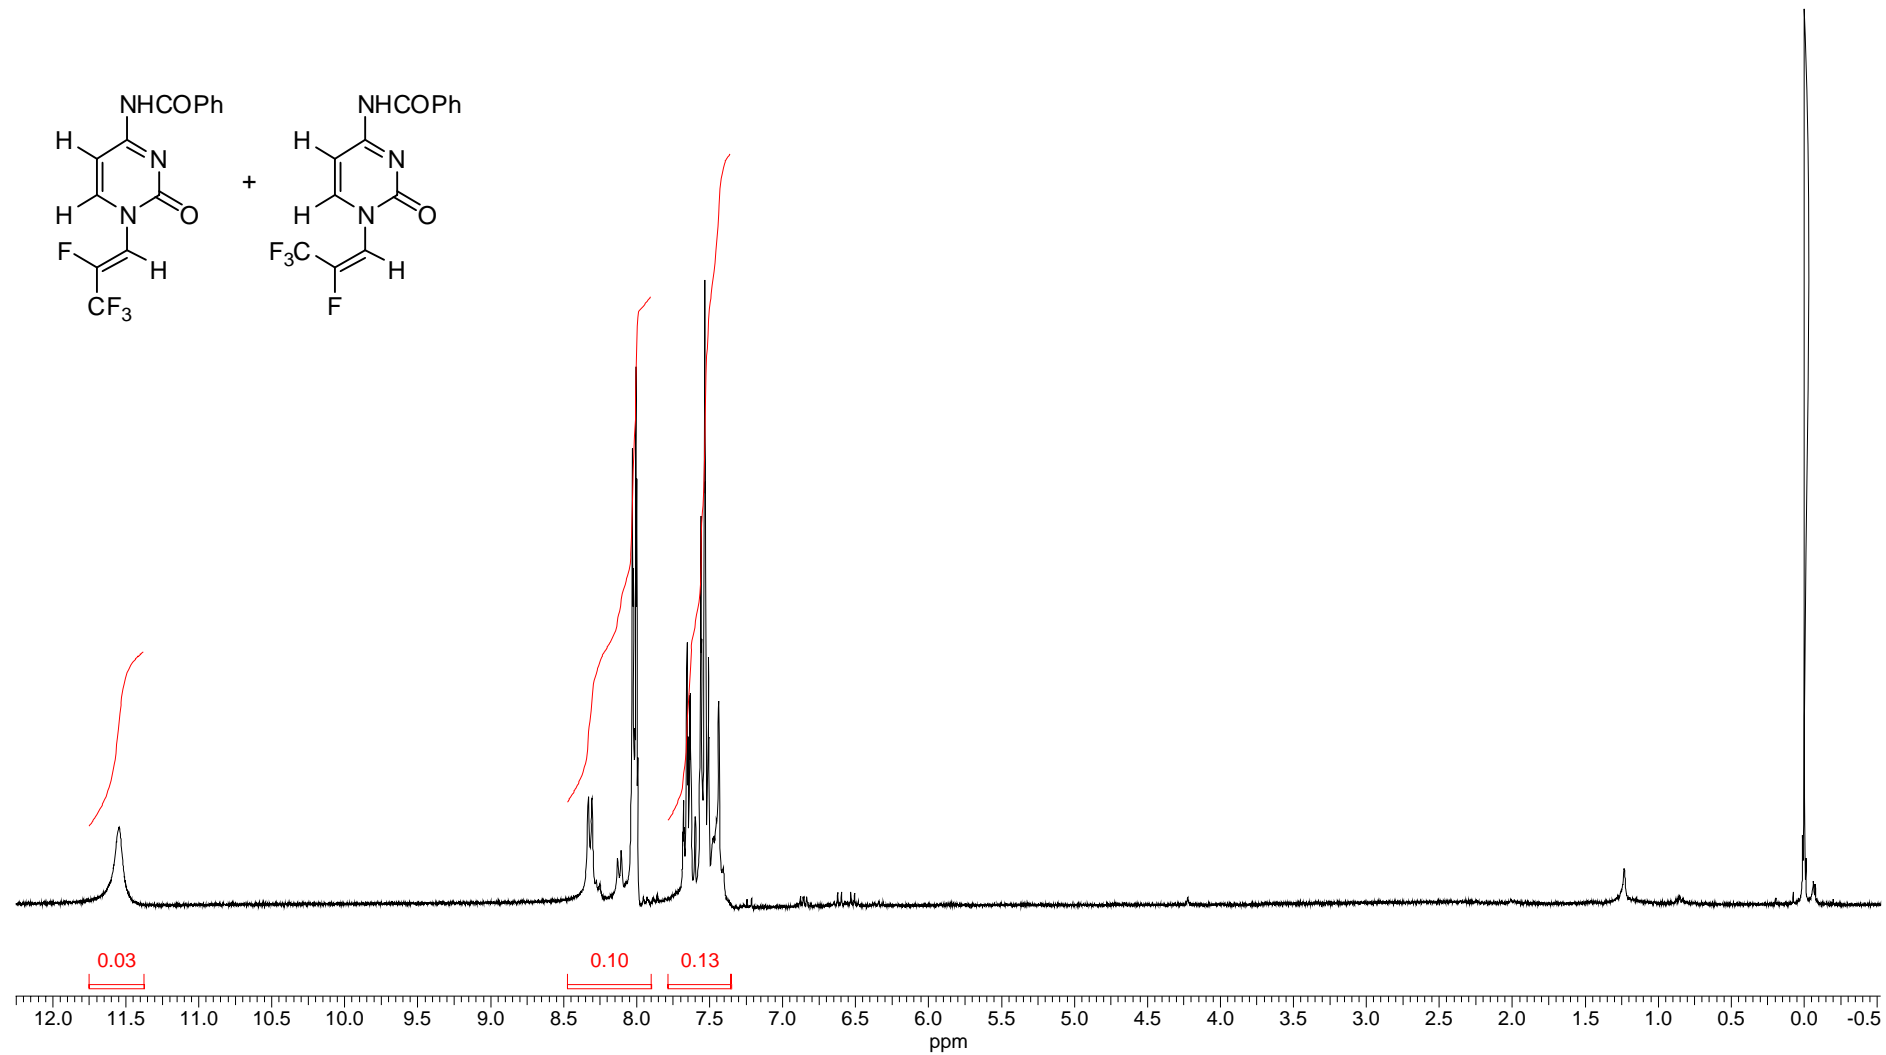

**Compound (Z)-9c**

<sup>1</sup>H NMR, 300 MHz, CDCl<sub>3</sub>



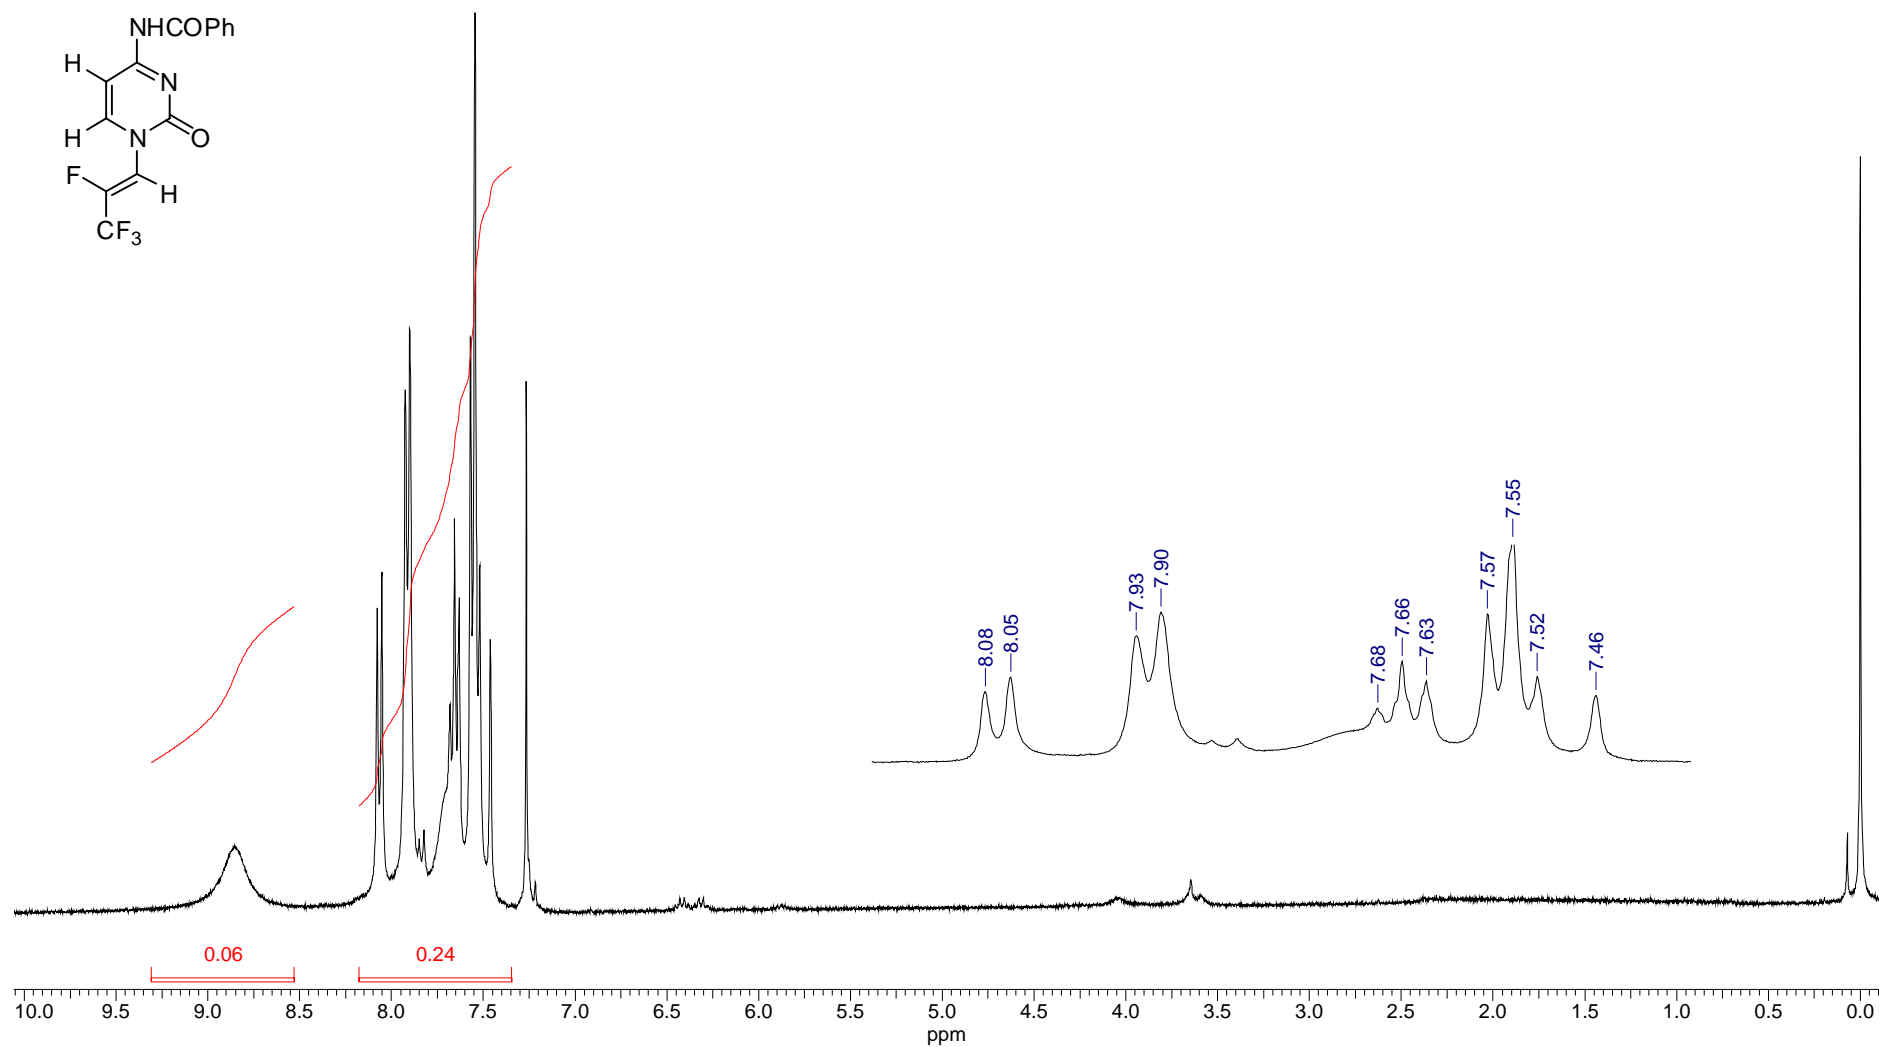

**Compound (E)-9c**

$^1\text{H}$  NMR, 300 MHz,  $\text{CDCl}_3$

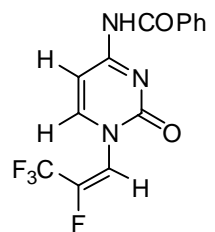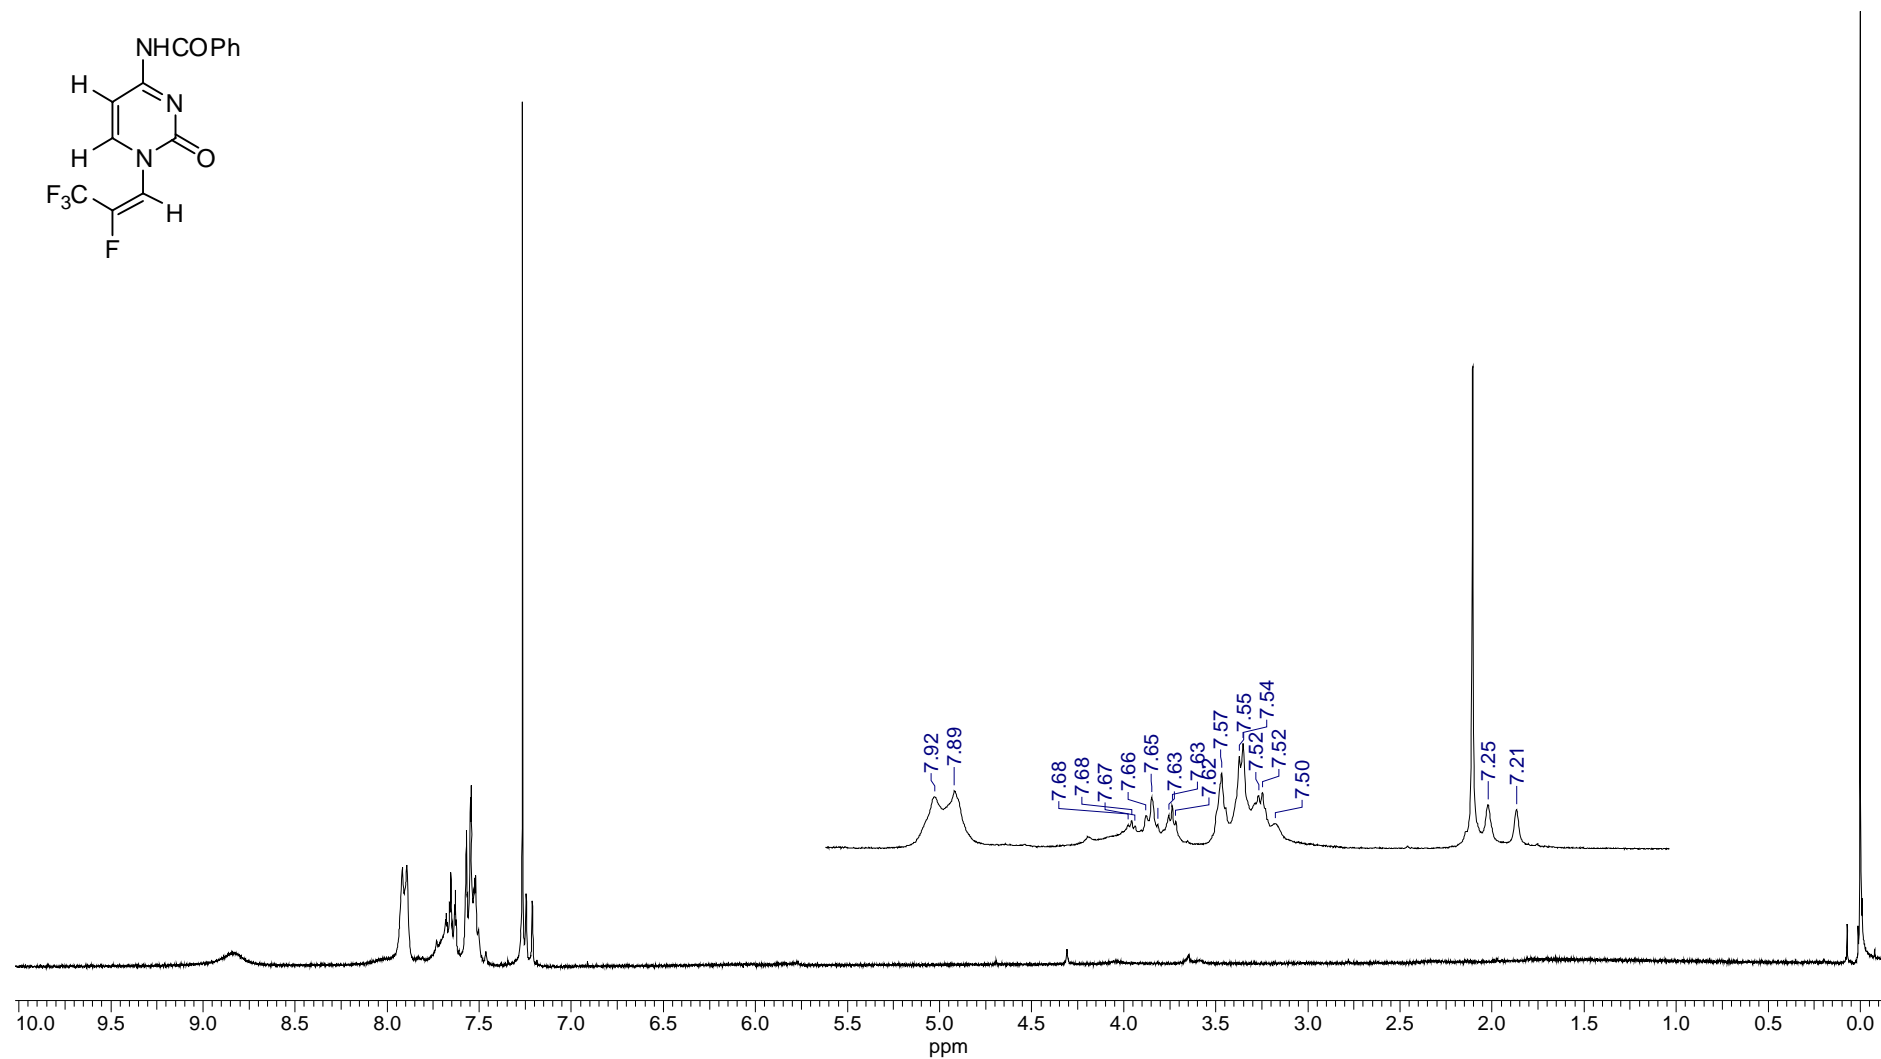

**Compound (Z)-9c**

$^{19}\text{F}$  NMR, 282 MHz,  $\text{CDCl}_3$

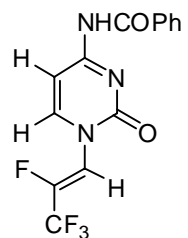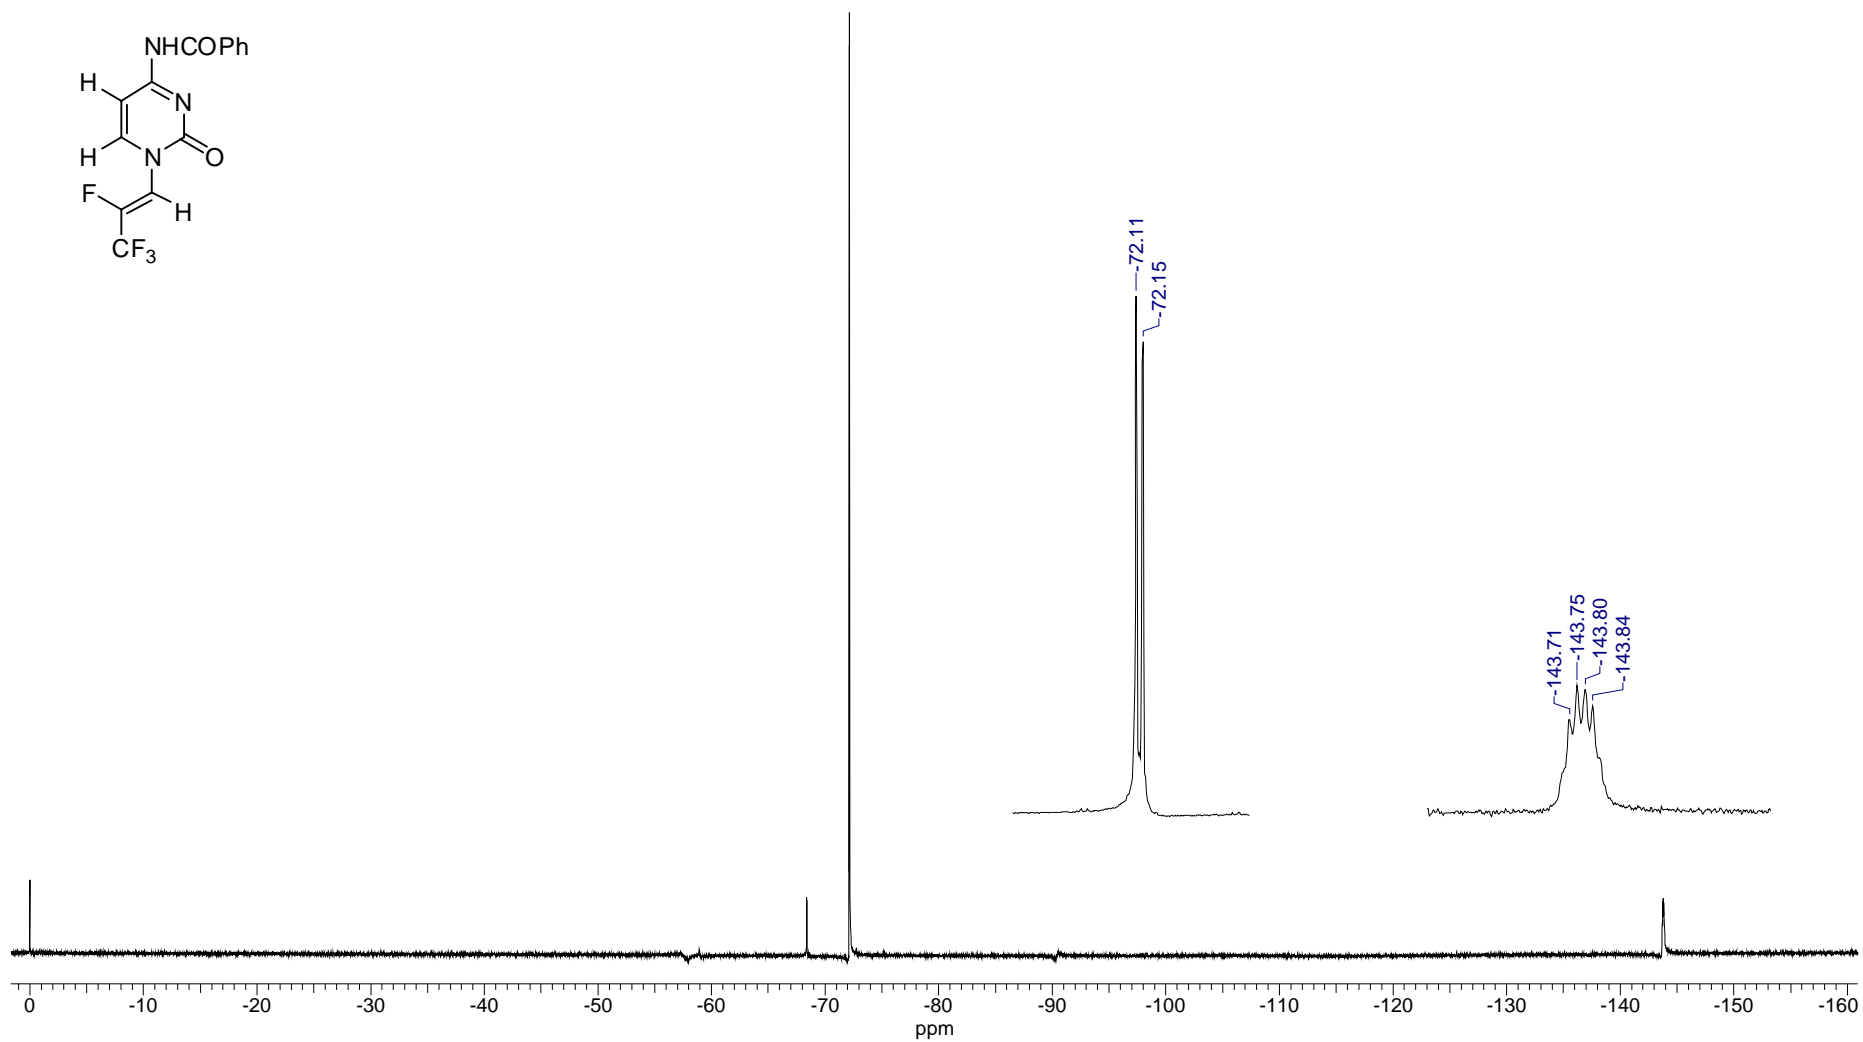

**Compound (E)-9c** as a mixture with the isomer **Z**

$^{19}\text{F}$  NMR, 282 MHz,  $\text{CDCl}_3$

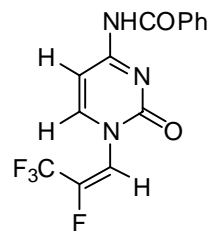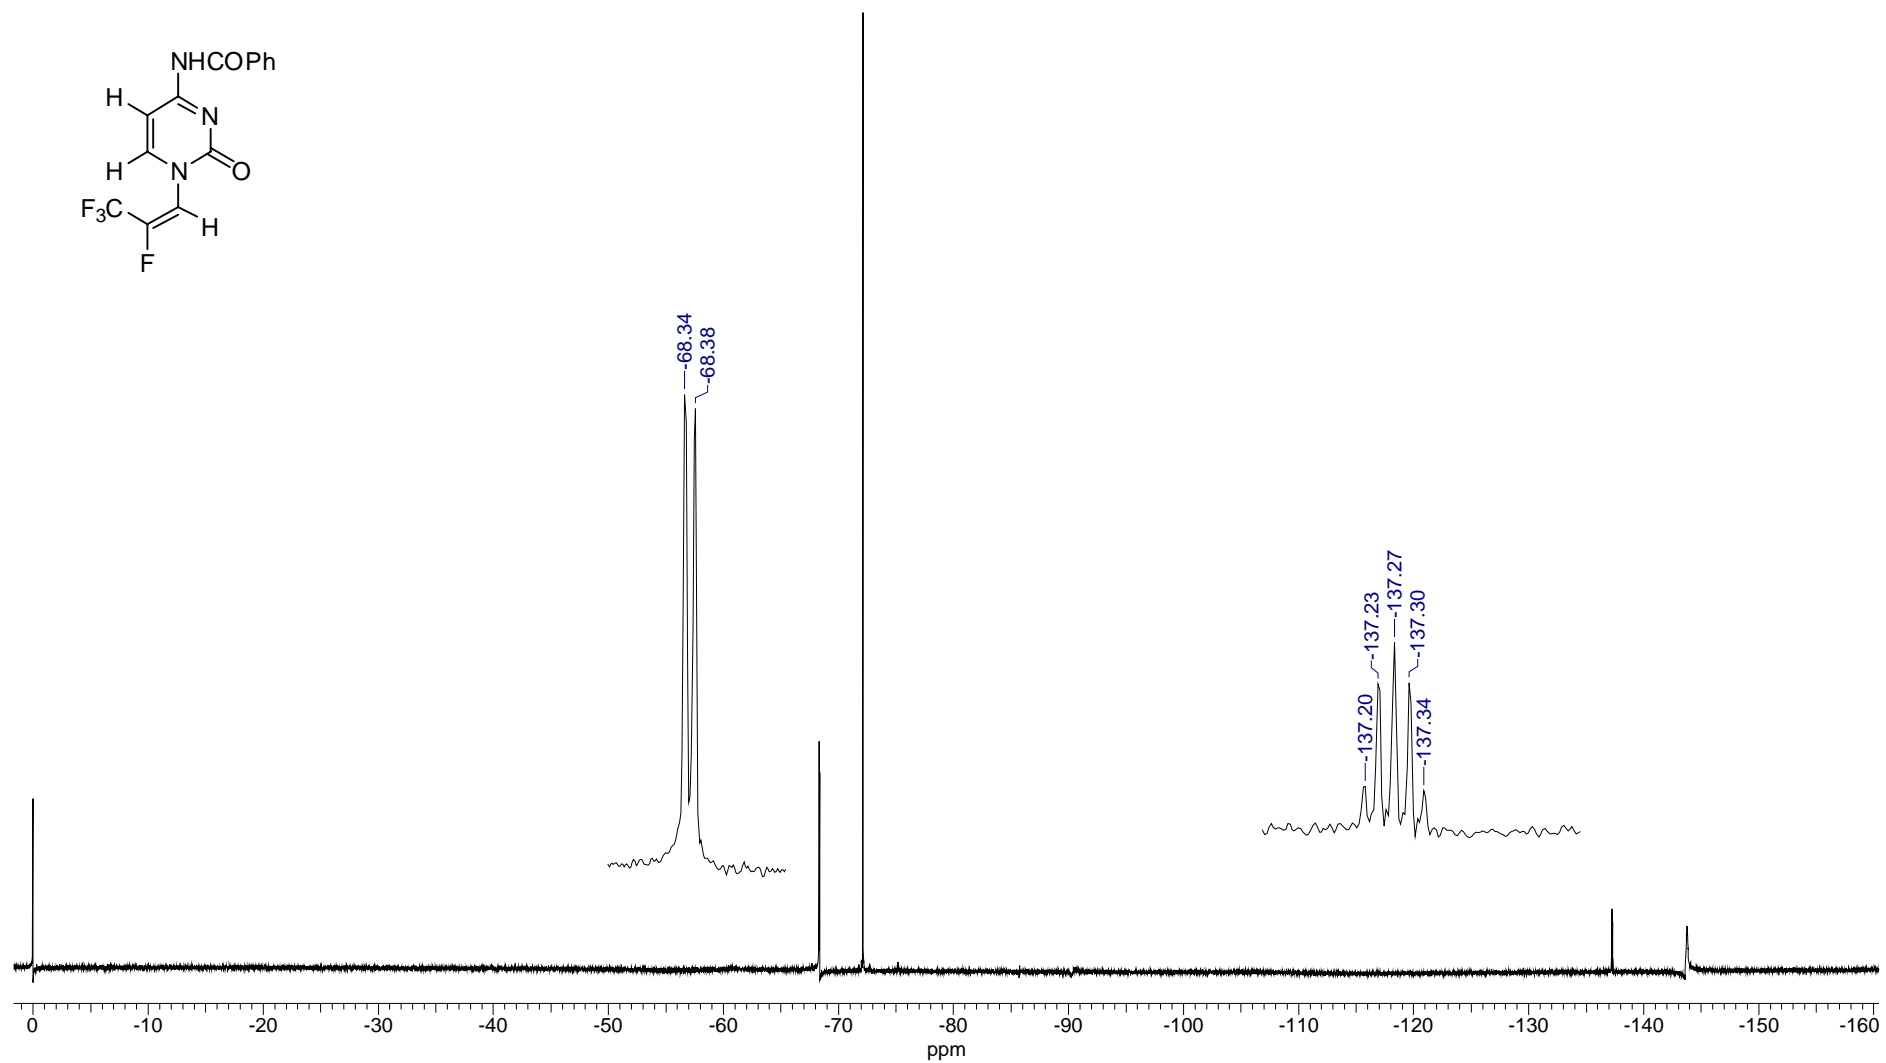

Supplement: b9nj00617f.pdf [file b9nj00617f.pdf]
